# **The *Campylobacter jejuni* CadF and FlpA fibronectin binding proteins facilitate signaling via host cell focal adhesions to inhibit cell motility and impede wound repair**

Courtney M Klappenbach,<sup>1</sup> Nicholas M. Negretti,<sup>1</sup> Jesse Aaron,<sup>2</sup> Teng-Leong Chew,<sup>2</sup> and Michael E. Konkel<sup>1\*</sup>

<sup>1</sup> School of Molecular Biosciences, College of Veterinary Medicine, Washington State University, Pullman, WA, USA, 99164-7520

<sup>2</sup> Advanced Imaging Center, Janelia Research Campus, Howard Hughes Medical Institute, Ashburn, VA 20147

Running title: *C. jejuni* manipulates host cell focal adhesions

Keywords: Pathogenesis, Focal adhesion modulation, Focal adhesion turnover, Cell migration, iPALM, bacteria-host cell interactions

Corresponding author:

Michael E. Konkel

School of Molecular Biosciences

Biotechnology Life Sciences Building, Room 447

College of Veterinary Medicine

Washington State University

Pullman WA 99164

Telephone: 509-335-5039

Email: [konkel@wsu.edu](mailto:konkel@wsu.edu)

## ABSTRACT

*Campylobacter jejuni* is a major foodborne pathogen that exploits the focal adhesions of intestinal cells to promote invasion and cause severe gastritis. Focal adhesions are multiprotein complexes involved in bidirectional signaling between the actin cytoskeleton and the extracellular matrix. We investigated the dynamics of focal adhesion structure and function in *C. jejuni* infected cells. We found that *C. jejuni* infection of epithelial cells results in an increased focal adhesion size, enhanced signaling, and altered topology, as demonstrated by confocal microscopy, immunoblots, and super-resolution iPALM. Infection by *C. jejuni* also resulted in an increase in cell adhesion strength, reduced host cell motility, and reduction of collective host cell migration, a fundamental step in intestinal villi healing. Mechanistic studies demonstrated that the *C. jejuni* fibronectin-binding proteins CadF and FlpA are involved in the changes in focal adhesion dynamics and alterations in cell behavior. These findings are important because they provide a putative mechanistic basis for the restricted intestinal repair observed in *C. jejuni*-infected animals and raise the possibility that bacterial adhesins that target extracellular matrix components can alter cell behavior by manipulating focal adhesions.

## INTRODUCTION

Significant research effort has focused on understanding how infectious agents cause disease in the host. Progress in understanding the fundamental mechanisms of bacterial pathogens has revealed common virulence strategies. Some of the most common targets for cellular level manipulation are the cytoskeleton and signaling pathways (Bhavsar, Guttman, & Finlay, 2007; Colonne, Winchell, & Voth, 2016; Lu & Goldberg, 2010), which often enables bacterial pathogens to invade host cells (Ribet & Cossart, 2015). Promoting bacterial internalization can protect pathogens from the immune system and prolong infection (de Souza Santos & Orth, 2015). Many extensively studied pathogens, such as *Salmonella*, *Shigella*, *Vibrio*, and *Listeria*, have been found to use bacterial adhesins and secreted proteins (effectors) to alter signaling pathways, resulting in cytoskeleton rearrangements that promote their internalization (Colonne et al., 2016; de Souza Santos & Orth, 2015; Lu & Goldberg, 2010). There are several major protein complexes connecting a cell to its external environment that can be targeted by bacteria for signaling manipulation.

In polarized epithelial cells, such as those in the intestine, there are four types of intracellular junctions: tight junctions, adherens junctions, hemidesmosomes, and focal adhesions. Tight and adherens junctions connect cells, whereas hemidesmosomes and focal adhesions facilitate cell-matrix connections (Backert, Boehm, Wessler, & Tegtmeyer, 2013; J. L. Lee & Streuli, 2014). Focal adhesions are unique from the others in that they connect the actin cytoskeleton to the extracellular matrix (ECM), making them dynamic and complex structures. The primary functions of focal adhesions are signaling, motility/migration, and adherence to the basal membrane. Signaling constitutes a major role for focal adhesions, as they can transmit bidirectional signals across the cell membrane (Harburger & Calderwood, 2009). A vast range of information is transmitted through focal adhesion signaling, including signals for survival, proliferation, differentiation, platelet aggregation, embryo development, and sensing extracellular and intracellular tension (J. L. Lee & Streuli, 2014; Wehrle-Haller & Imhof, 2002; Wrighton, 2013; Wu, 2007). A major function of these signals is to direct migration of epithelial cells in the intestinal villi, an important process for homeostasis (Efsthathiou & Pignatelli, 1998). In the intestine, new cells are produced from pluripotent stem cells in the villus crypt, and these migrate along the villus-crypt axis towards the villus tip where they are eventually extruded (Efsthathiou & Pignatelli, 1998; Heath, 1996). The majority of studies on the cellular migration process have focused on collective epithelial cell migration in response to villi damage (Albers, Lomakina, & Moore, 1995; Lacy, 1988; Lotz, Rabinovitz, & Mercurio, 2000; Moore, Carlson, & Madara, 1989; Ziegler, Gonzalez, & Blikslager,

2016). When the villi become damaged, the basal lamina may become exposed or denuded (Ziegler et al., 2016). To repair this, healthy epithelial cells surrounding the wound will depolarize and migrate to cover the basal membrane (Albers et al., 1995; Lacy, 1988; Lotz et al., 2000; Moore et al., 1989; Ziegler et al., 2016). Cell migration is dependent on focal adhesion dynamics (Swanson et al., 2011), whereby cells must simultaneously assemble new focal adhesions at the leading edge of the cell and disassemble old focal adhesions from the trailing edge of the cell (Nagano, Hoshino, Koshikawa, Akizawa, & Seiki, 2012). The balanced process of these actions allows cells to have directed migration (Nagano et al., 2012). In addition to motility and migration, focal adhesions physically adhere cells to their external environment by attaching to the ECM. Focal adhesions depend on many proteins to manage these roles and functions.

Focal adhesions are composed of an organized array of proteins, collectively known as the focal adhesion “adhesome” (Le Devedec et al., 2012). Integrins, transmembrane proteins that bind both ECM components and intracellular signal transduction proteins, comprise the base of focal adhesions (Harburger & Calderwood, 2009). Structural proteins, such as talin and vinculin, connect integrins to the actin cytoskeleton and are required to strengthen focal adhesions (Critchley & Gingras, 2008). Last, signaling proteins allow the focal adhesion to send bidirectional signals through the cell membrane. These proteins include adaptors, scaffolds, kinases, and proteases (Wu, 2007). The coordinated action of adhesome proteins allows the cell to transmit signals between the extracellular environment and the intracellular actin cytoskeleton, as well as perform important cell functions such as motility/migration and adhesion.

Since many pathogens rely on the actin cytoskeleton and signaling proteins to cause infection in a host, focal adhesions are prime targets. *Campylobacter jejuni* is a major foodborne pathogen most commonly acquired from ingestion of undercooked chicken or foods cross-contaminated with raw poultry. Despite being the most common culture-proven cause of bacterial gastroenteritis worldwide (Ruiz-Palacios, 2007), our knowledge of the specific virulence mechanisms and host-cell interactions is incomplete. Known is that severe *C. jejuni* infection results in diarrhea with blood in the stool and is accompanied by villus blunting (Konkel, Monteville, Rivera-Amill, & Joens, 2001; Schnee & Petri, 2017; Wassenaar & Blaser, 1999). It is expected that villi restitution and collective cell migration would repair the tissue damage, however it is not known if the phenotype observed in *C. jejuni* infection is due to slowing this process of villi repair. The purpose of this study was to determine if *C. jejuni* reduces cell motility, and if it does, the cellular mechanism that drives the alteration in cell behavior. We discovered that *C. jejuni* manipulates the



dynamics of the focal adhesion via the bacterial CadF and FlpA fibronectin-binding proteins, resulting in altered cell behavior and function.

## RESULTS

### *C. jejuni* reduces host cell motility

To understand how *C. jejuni* manipulates the behavior of host cells during infection, we first examined the effect of *C. jejuni* on individual host cell motility using the A549 epithelial cell line. This cell line was chosen for the initial assays because the cells are highly motile (Colburn & Jones, 2018). Cells were infected with *C. jejuni*, imaged for five hours, and then individual cells were tracked to quantify their motility. Cell motility was significantly decreased by infection with *C. jejuni* (Figure 1). Observation of the paths of individual cells over the course of the five hour infection shows that *C. jejuni* infected cells traveled a shorter distance (path distance) and remained closer to their starting position (path displacement) (Figure 1A-B). Processivity, path distance divided by path displacement, was calculated to quantify this observation. This measurement indicates a cell's directional movement and is commonly used to assess cell motility (Colburn & Jones, 2017). *C. jejuni* infected cells showed a significant decrease in processivity compared to non-infected cells (Figure 1C).

We also looked at the effects of two other pathogens, *Salmonella* Typhimurium and *Staphylococcus aureus*, on cell motility. *S. aureus* causes sickness by staphylococcal enterotoxins (SE), triggering vomiting and inflammation of the intestine (Argudin, Mendoza, & Rodicio, 2010). *S. Typhimurium*, however, causes disease by invading host cell intestinal tissues. Both *C. jejuni* and *Salmonella* infection require intimate bacterial-host cell contact for disease, while *S. aureus* does not. Based on this, we investigated the effect of both bacteria on single cell motility. A549 epithelial cells were infected with *S. Typhimurium* or *S. aureus* for one hour. Cells were then rinsed and imaged for five hours. Chloramphenicol was used at a bacteriostatic concentration to ensure bacterial CFU was consistent throughout the experiment for all bacteria tested. Cells infected with *S. Typhimurium* had significantly lower motility than non-infected cells; however, there was no significant difference in cell motility for cells infected with *S. aureus* (Supplemental Figure 1). This result suggests that inhibition of host cell motility is conserved among some bacterial species.

**Figure 1:** *C. jejuni* infection of A549 epithelial cells decreases their motility. A549 cells were grown on a laminin-based extracellular matrix prior to infection with *C. jejuni*. An image was taken every five minutes for five hours, and images were analyzed to track cell movement. Windrose plots (A-B) show the tracked paths of individual cells (different colors) over five hours. **A.** Windrose plot of non-infected cells shows that most cells move far from the starting position (center of the plot: 0,0). **B.** Windrose plot of *C. jejuni* infected cells shows that they do not move as far from their starting position when compared to non-infected cells. **C.** *C. jejuni* causes a significant decrease in processivity, calculated as path distance divided by displacement averaged for all cells. Error bars represent SEM, \* indicates  $p < 0.0001$  (Students T Test). More than 500 cells were imaged per condition.

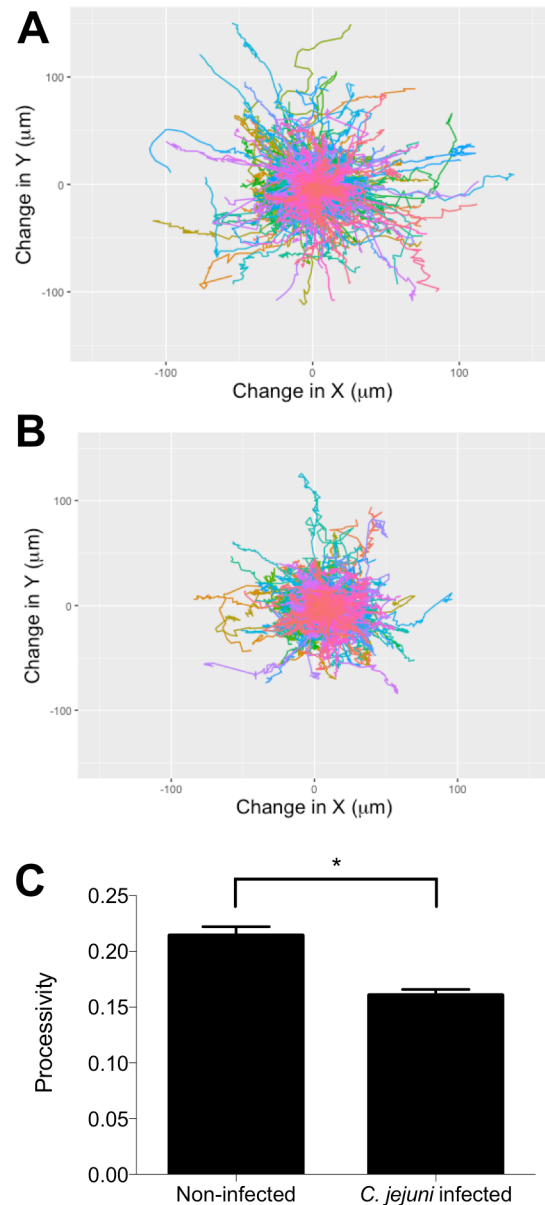

### *C. jejuni increases the size of the focal adhesion in a flgL dependent manner*

Since epithelial cell motility is driven by a balance between focal adhesion assembly and disassembly (Nagano et al., 2012), we next investigated if *C. jejuni* alters host cell focal adhesion structure. The human INT 407 cell line was used for these assays, as this particular cell line has been used extensively by researchers to dissect *C. jejuni*-host cell interactions (Biswas, Itoh, & Sasakawa, 2000; Negretti et al., 2019; Verhoeff-Bakkenes, Hazeleger, Zwietering, & De Jonge, 2008). Cells were infected with *C. jejuni* and then fixed and stained for the host cell protein paxillin, which is a major signaling and adaptor protein in focal adhesions (Schaller, 2001). Confocal microscopy showed significant changes in paxillin localization between infected and non-infected cells (Figure 2A). In non-infected cells, paxillin was largely localized in the cytosol, whereas in *C. jejuni* infected cells it was concentrated at focal adhesions. This change was found to be significantly different when scored by an individual blinded to the sample identity, where a score of 0 represented complete cytosolic localization and 2 represented no cytosolic localization. Consistent with this observation, quantitation of focal adhesion size in infected and non-infected cells showed that *C. jejuni* caused a significant increase in focal adhesion size from 30 to 75 minutes post-infection, peaking at 45 and 60 minutes (Figure 2B). Many *C. jejuni* also appeared to localize near focal adhesions (Figure 2D-E). This is consistent with previously published results (Konkel, Samuelson, Eucker, Shelden, & O'Loughlin, 2013) showing that *C. jejuni* colocalized with paxillin and vinculin, another major focal adhesion protein. This led us to investigate the bacterial factors required for the observed changes.

The flagellum is an important virulence factor for *C. jejuni*; it confers motility and also serves as the bacterium's type three secretion system to deliver effector proteins into a host epithelial cell (Grant, Konkel, Cieplak, & Tompkins, 1993; Konkel et al., 2004; Negretti et al., 2021; Wassenaar, Bleumink-Pluym, & van der Zeijst, 1991; Yao et al., 1994). To understand if the changes in focal adhesion structure were driven by bacterial factors, *C. jejuni* without the FlgL protein (flagella hook junction protein) were tested alongside wild-type bacteria. A *C. jejuni flgL* mutant is non-motile and deficient in the delivery of bacterial effector proteins into the cytosol of a host cell (Neal-McKinney & Konkel, 2012; Negretti et al., 2019). In contrast to the *C. jejuni* wild-type strain, the *flgL* mutant had no effect on focal adhesion size, showing a similar focal adhesion distribution to non-infected cells (Figure 3). The *flgL* complemented isolate, however, restored the phenotype observed in the wild-type bacteria. This result demonstrates that the focal adhesion effect is dependent on infection with virulent bacteria.

**Figure 2:** *C. jejuni* associates with and increases the size of the focal adhesion footprint and changes the localization of paxillin. INT 407 cells were infected with *C. jejuni* for 30 to 75 minutes prior to fixing and immunostaining for paxillin, actin, and *C. jejuni*. **A.** Paxillin is localized to the cytosol in non-infected cells and localized at the focal adhesion in *C. jejuni* infected cells. Paxillin localization was determined by an individual blinded to the samples, where 0 = complete focal adhesion localization and 2 = cytosolic localization. **B.** *C. jejuni* causes a significant increase in focal adhesion size at 30, 45, 60, and 75 minutes post-infection. Error bars represent standard deviation of > 1000 focal adhesions and \* indicates  $p < 0.05$  compared to non-infected sample (One-way ANOVA, Tukey's multiple comparisons test). **C.** Representative image of non-infected cells. **D.** Representative images of *C. jejuni* infected cells. **E.** Insets from panel D showing that *C. jejuni* is associated with paxillin. Paxillin is shown in cyan, actin in magenta, and *C. jejuni* in yellow. The focal adhesions in infected cells appear larger than those in non-infected cells, and there is less paxillin in the cytosol of *C. jejuni* infected cells.

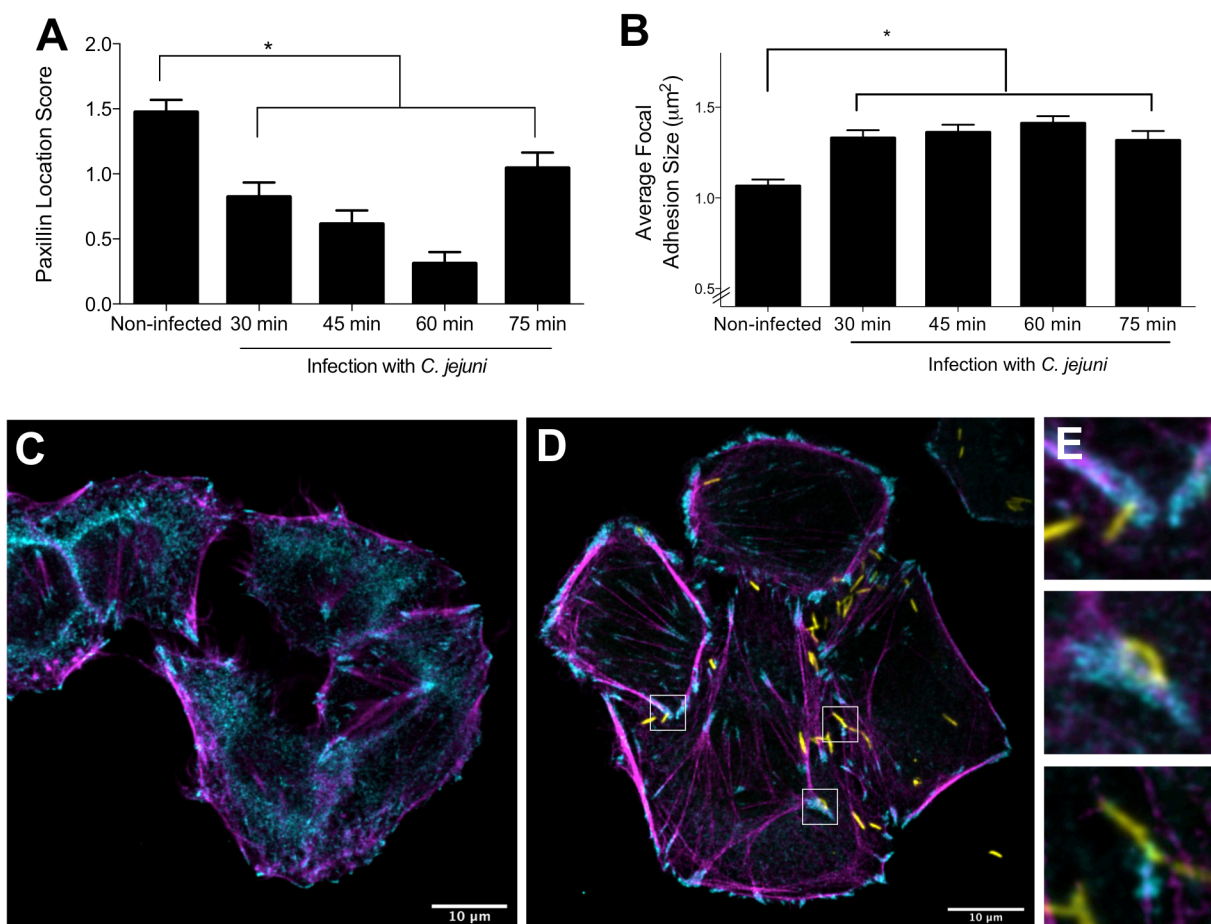

### *C. jejuni* slows paxillin turnover and changes the topology of the focal adhesion

To determine the mechanism of the focal adhesion size increase, we investigated the turnover rate of paxillin at the focal adhesion in INT 407 cells. Proteins at the focal adhesion regularly turnover and have unique residency times (Le Devedec et al., 2012; Stutchbury, Atherton, Tsang, Wang, & Ballestrem, 2017). INT 407 cells were transfected with a plasmid containing tdEos conjugated to paxillin. The tdEos protein photoswitches from green to red when exposed to UV

light. By photoswitching one-half of a cell's focal adhesions, it is possible to measure focal adhesion turnover by observing the rate that the photoswitched protein replaces the non-photoswitched protein over time (Figure 4A). At the non-photoswitched half of the cell, red photoswitched paxillin increased over time at focal adhesions (Figure 4B). There was a significant decrease in the average rate of red fluorescence appearing in the non-photoswitched half of the cell for the *C. jejuni* infected cells compared to non-infected cells. This implies slower focal adhesion turnover and a decrease in the dynamicity of the focal adhesions. As a result of *C. jejuni* manipulating focal adhesion structure and signaling, the focal adhesion's ability to turnover paxillin is slowed.

**Figure 3:** *C. jejuni* driven focal adhesion size increase is dependent on a functional flagellum. INT 407 cells were infected with a *C. jejuni* wild-type strain, a *C. jejuni*  $\Delta flgL$  mutant, or a *C. jejuni*  $\Delta flgL$  + *flgL* complemented strain for 60 minutes prior to fixing and immunostaining for paxillin, actin, and *C. jejuni*. Focal adhesion size was determined by measuring the paxillin footprint. **A.** Frequency distribution of focal adhesion sizes for the four conditions is shown. Solid lines show frequency distribution, and dashed lines show the mean of all focal adhesions within a category. Non-infected and *C. jejuni*  $\Delta flgL$  infected cells have a similar distribution of focal adhesion sizes while cells infected with the *C. jejuni* wild-type strain and *C. jejuni*  $\Delta flgL$  + *flgL* complemented isolate have a similar distribution. **B.** The bar graph shows the mean focal adhesion size for each condition. The *C. jejuni* wild-type strain increases the average focal adhesion size when the *flgL* gene is present, indicating that motility and/or protein secretion are required. Error bars represent SEM, \* indicates  $p < 0.0001$  (One-way ANOVA, Tukey's multiple comparisons test), > 3000 focal adhesions measured per condition.

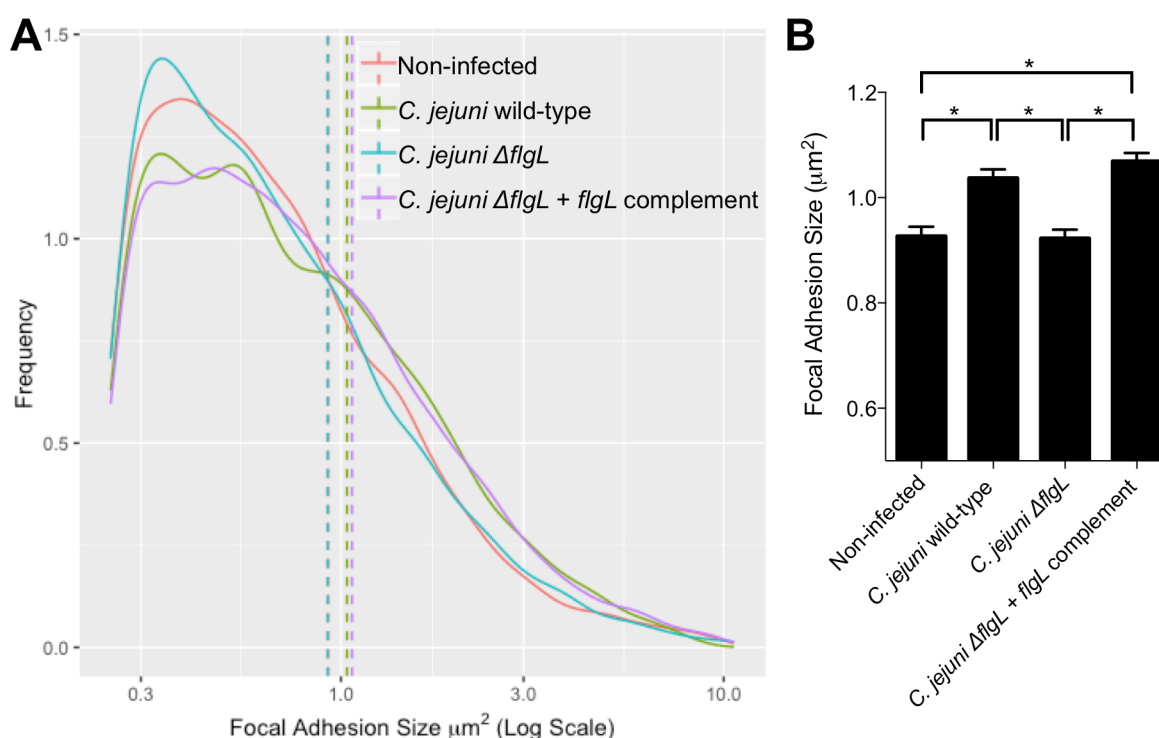

While we observed that *C. jejuni* infection of epithelial cells caused an increase in focal adhesion size, it was not clear if the structural topology within the focal adhesion was changing. To observe the micro-scale structure of the focal adhesions in *C. jejuni* infected cells, super-resolution iPALM (interferometric photoactivated localization microscopy) was utilized to observe the organization of proteins within the focal adhesion at sub-20 nm resolution (Shtengel et al., 2009). tdEos-Paxillin was used as our indicator of the focal adhesion structure due to its critical role in focal adhesion organization and *C. jejuni* invasion. We observed that the spatial localization of paxillin was significantly different in *C. jejuni* infected cells compared to non-infected cells (Figure 5, Supplemental Figure 2). The average Z position of paxillin, measured as the distance from the gold fiducial beads embedded in the coverslip, was  $40.3 \text{ nm} \pm 2.2 \text{ nm}$  in non-infected cells. This is consistent with the published value of  $36.0 \text{ nm} \pm 4.7 \text{ nm}$  (Kanchanawong et al., 2010). Paxillin in *C. jejuni* infected cells was significantly higher, at  $56.7 \text{ nm} \pm 1.6 \text{ nm}$  (Figure 5A). In addition, we calculated the thickness of the paxillin plaque. The plaque in non-infected cells had an average thickness of  $26.9 \text{ nm} \pm 1.8 \text{ nm}$ , while *C. jejuni* infected cells had significantly thicker focal adhesions of  $32.6 \text{ nm} \pm 0.8 \text{ nm}$  (Figure 5B). These results supported the confocal microscopy studies and demonstrated that *C. jejuni* manipulates the nanoscale localization of paxillin in the focal adhesion.

**Figure 4:** *C. jejuni* infection slows the turnover of paxillin at the focal adhesion. INT 407 cells were transfected with a tdEos-Paxillin plasmid, which photoswitches from green to red when exposed to UV light. Cells were infected for approximately 60 minutes with *C. jejuni* prior to imaging. **A.** One-half of the cell was exposed to UV light to switch the tdEos-paxillin from green to red, and then the cell was imaged every 5 seconds for approximately 300 seconds. As the focal adhesion turns over, the green paxillin in the non-photoswitched half of the cell is replaced with red paxillin from the photoswitched half of the cell. **B.** Enlarged view of a focal adhesion in the non-photoswitched half of the cell showing the red fluorescence increasing over time. **C.** Normalized fluorescence was calculated as the average intensity of red fluorescence at focal adhesions in the non-photoswitched half of the cell divided by each focal adhesion's initial red fluorescence intensity. Lines represent the average of all focal adhesions for a condition. The focal adhesions of *C. jejuni* infected cells took longer to show increased red fluorescence and reached an overall lower red fluorescence intensity. The vertical orange line represents the time of photoswitching. **D.** The average slope of red fluorescence in the non-photoswitched half of the cell was calculated for all focal adhesions by a linear regression between normalized fluorescence and time. *C. jejuni* infected cells had decreased slope compared to non-infected cells, indicating a slower rate of paxillin turnover. Error bars represent SEM and \* indicates  $p < 0.0001$  (Student's T test). More than 200 focal adhesions measured per condition.



**Figure 4:** *C. jejuni* infection slows the turnover of paxillin at the focal adhesion.

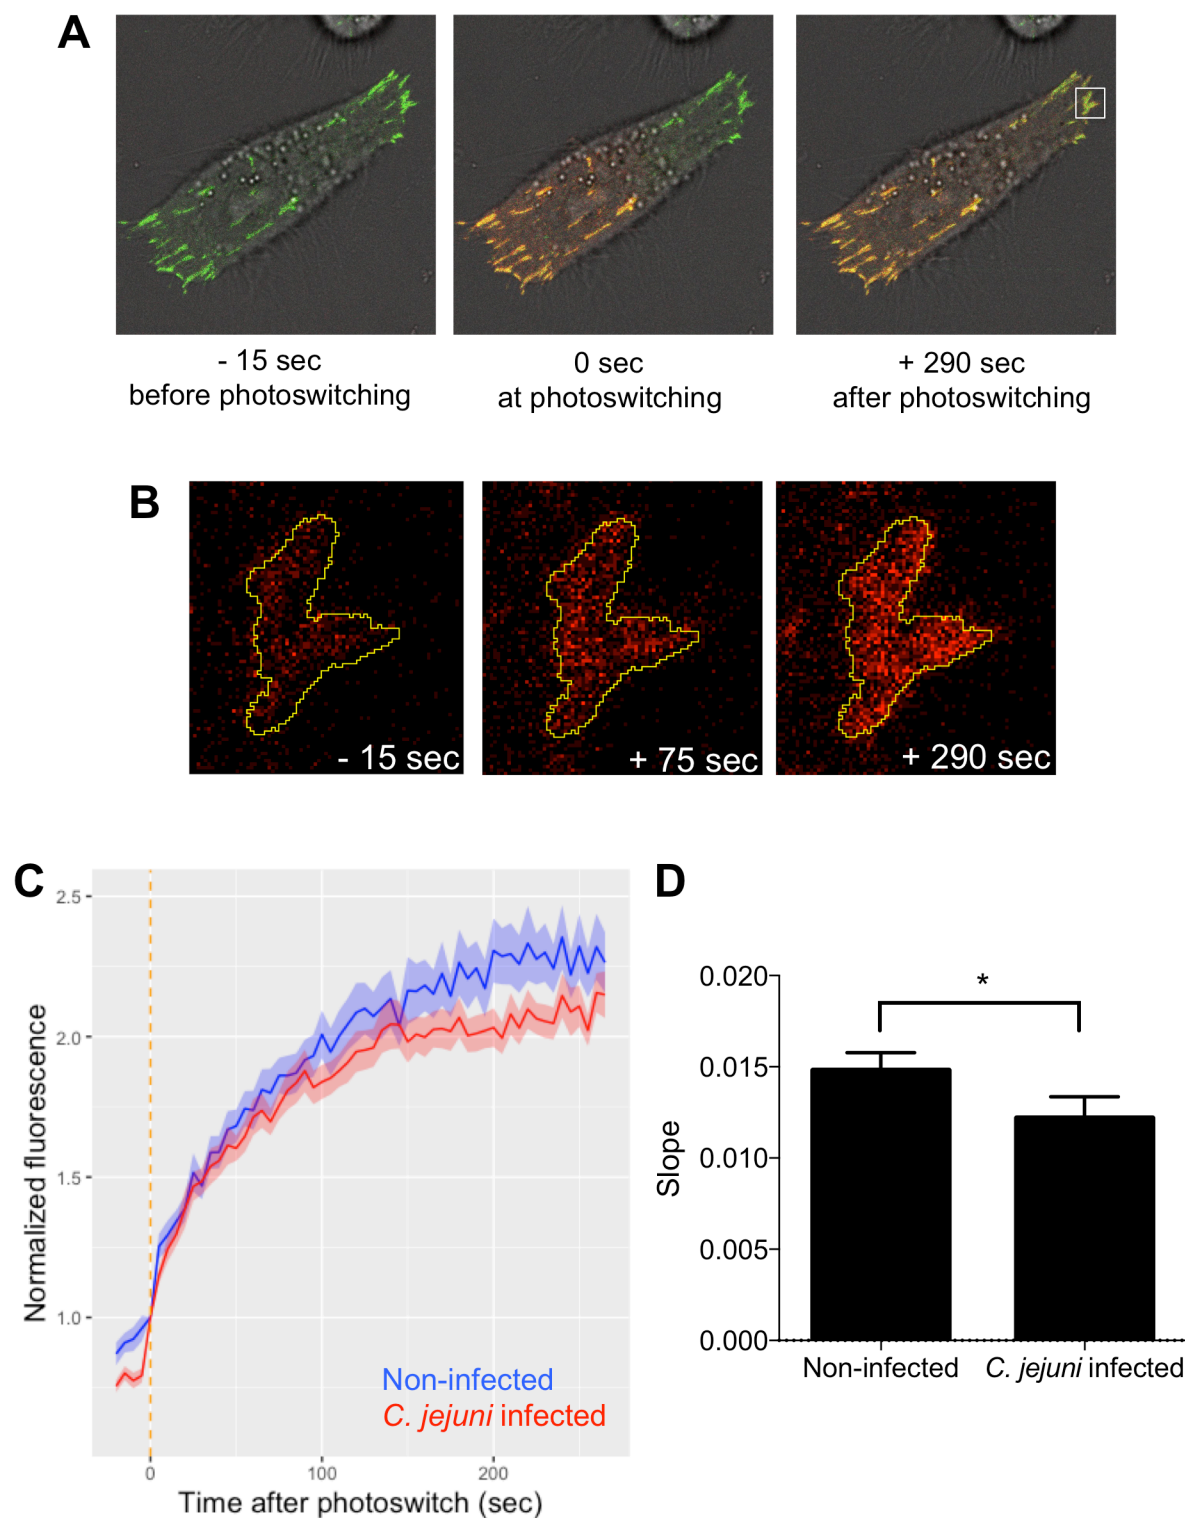

### *C. jejuni* enhances signaling pathways at the focal adhesion

Phosphorylation of paxillin (at Tyr118) is indicative of FA assembly and activation of the FAK and Src kinases (Deakin & Turner, 2008; Zaidel-Bar, Milo, Kam, & Geiger, 2007). Previous

**Figure 5:** *C. jejuni* changes the nanoscale topology of the focal adhesion plaque. Super-resolution iPALM microscopy was performed to determine the nanoscale architecture of the focal adhesion in *C. jejuni* infected cells compared to non-infected cells. **A.** The Z position of a paxillin plaque was determined as the average z position of all fluorophores detected within a focal adhesion. The average Z position of *C. jejuni* infected focal adhesions was significantly higher than non-infected cells. **B.** The average thickness of the focal adhesion was determined as the inner quartile range of all fluorophores within the focal adhesion. The average thickness of *C. jejuni* infected focal adhesions was significantly higher than non-infected cells. Error bars represent SD, \* indicates  $p < 0.01$ , \*\* indicates  $p < 0.0001$  (Student's T-Test).

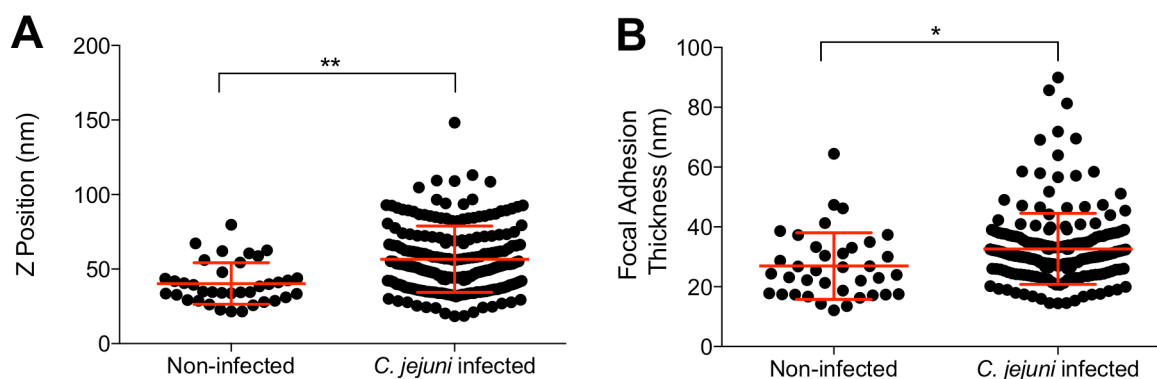

research has revealed that paxillin is phosphorylated during *C. jejuni* infection of INT 407 cells in a time-dependent manner (Monteville, Yoon, & Konkel, 2003). To determine if paxillin phosphorylation is related to focal adhesion signaling, we tested the role of focal adhesion kinase (FAK) and Src kinase in paxillin phosphorylation and *C. jejuni* invasion. It is well established that these two kinases form a complex together at focal adhesions to phosphorylate many proteins, including paxillin (Mitra, Hanson, & Schlaepfer, 2005). We treated INT 407 epithelial cells with selective FAK (TAE226) and Src (PP2) inhibitors prior to and during infection with *C. jejuni*. Paxillin was then immunoprecipitated from the cells, and the relative amount of phosphorylated paxillin was determined by immunoblot analysis. Consistent with previous research (Monteville et al., 2003), *C. jejuni* caused a significant increase in phosphorylated paxillin. Importantly, the presence of the TAE226 or PP2 inhibitors eliminated this effect (Figure 6A and 6B). To verify the biological significance of these kinases, *C. jejuni* invasion in the presence of these inhibitors was determined by the gentamicin protection assay. Both kinase inhibitors caused a significant reduction in the number of internalized bacteria (Figure 6C), which is consistent with previous reports (Boehm et al., 2011; Eucker & Konkel, 2012; Konkel et al., 2013; Krause-Gruszczynska et al., 2011). To further confirm that the changes in paxillin signaling are related to focal adhesion dynamics, we investigated the phosphorylation of paxillin at the focal adhesion by microscopy. INT 407 epithelial cells were infected with *C. jejuni* then fixed and stained with paxillin and phosphorylated paxillin (Y118) antibodies. Cells were imaged by confocal microscopy, and the intensity of paxillin and phosphorylated paxillin was quantified at each focal adhesion. The relative amount of



phosphorylated paxillin compared to total paxillin increased significantly in *C. jejuni* infected cells compared to non-infected cells (Figure 6D-G). This result demonstrated that the *C. jejuni*-driven paxillin signaling changes are occurring at the focal adhesion.

### *Biological significance of focal adhesion manipulation*

Focal adhesion size has been found to correlate with cellular adherence strength (May, Kolbe, Wang, Schmidt, & Genth, 2012; Sen & Kumar, 2009). To see if *C. jejuni* is manipulating focal adhesion strength in addition to size, we used a trypsin-based cell detachment assay. Trypsin is a protease that causes cultured cell detachment. At low concentrations, trypsin treatment can be used to determine adhesion strength (Sen & Kumar, 2009). Cells that are more strongly attached to the substrate will take longer to detach than cells more weakly attached. INT 407 cells were infected with *C. jejuni* or treated with nocodazole prior to treatment with a low concentration of trypsin. Nocodazole inhibits microtubule polymerization and was used as a positive control, as it increases focal adhesion size and strength (Fokkelman et al., 2016). Cells were imaged for 15 minutes with a phase-contrast microscope to observe the cell rounding that precedes detachment. *C. jejuni* and nocodazole both caused a delay in cell rounding when compared to non-infected cells (Figure 7), indicating that they both caused an increase in focal adhesion strength.

**Figure 6:** *C. jejuni* invasion results and paxillin phosphorylation by FAK and Src kinases. **A.** INT 407 cells were incubated with *C. jejuni* for 45 minutes in the presence of TAE226 (an inhibitor of FAK) or PP2 (an inhibitor of Src). Cells were lysed, and paxillin was immunoprecipitated. SDS-polyacrylamide gels were run, and blots were probed for phosphorylated (Y118) paxillin and total paxillin. **B.** Band intensity was measured, and phosphorylated paxillin was normalized by total paxillin. Results showed that *C. jejuni* causes a significant increase in paxillin phosphorylation, but that the addition of TAE226 or PP2 eliminates this effect. Error bars represent standard deviation between two biological replicates. **C.** INT 407 cells were incubated with *C. jejuni* and inhibitors prior to determining the CFU of internalized bacteria by the gentamicin protection assay. TAE226 and PP2 caused a significant decrease in the number of internalized bacteria compared to non-treated cells. Error bars represent standard deviation between technical replicates. \* indicates  $p < 0.05$  compared to non-treated or non-infected wells (One-way ANOVA, Dunnett's multiple comparisons test).  $\Delta flgL$  mutant (non-invasive) was used as a negative control. **D-G.** INT 407 cells infected with *C. jejuni* harboring a GFP plasmid for 60 minutes. Cells were then fixed and stained with a paxillin and phospho-paxillin (Y118) antibody. Focal adhesions were imaged by confocal microscopy. The relative amount of phospho-paxillin was determined by segmenting the focal adhesion and measuring the intensity of paxillin and phospho-paxillin within the segmented area. The phospho-paxillin intensity was divided by the paxillin intensity for each focal adhesion. **D.** The relative amount of phospho-paxillin at the focal adhesion increased significantly in *C. jejuni* infected cells compared to non-infected cells. Error bars represent the standard deviation of all focal adhesions per condition ( $> 6000$ ) and \* represents  $p < 0.0001$  (Student's T Test). **E.** Representative image of focal adhesions showing paxillin staining only. **F.** Focal adhesion showing phospho-paxillin staining only. **G.** Composite of E and F, showing paxillin and phospho-paxillin staining.

To understand the effect of focal adhesion manipulation on wound healing, we tested the collective cell migration of human T84 epithelial cells in response to *C. jejuni*. The human T84 colonic cell line represents an ideal model to mimic tissue-level responses to *C. jejuni*, as *C. jejuni* infects the human colon (Black, Levine, Clements, Hughes, & Blaser, 1988; van Spreeuwel et al., 1985). Additionally relevant to these experiments is that T84 cells have been used to mimic the wound healing response in the intestinal villi (Lotz et al., 2000). Small circular scratches were made

**Figure 6:** *C. jejuni* invasion results and paxillin phosphorylation by FAK and Src kinases.

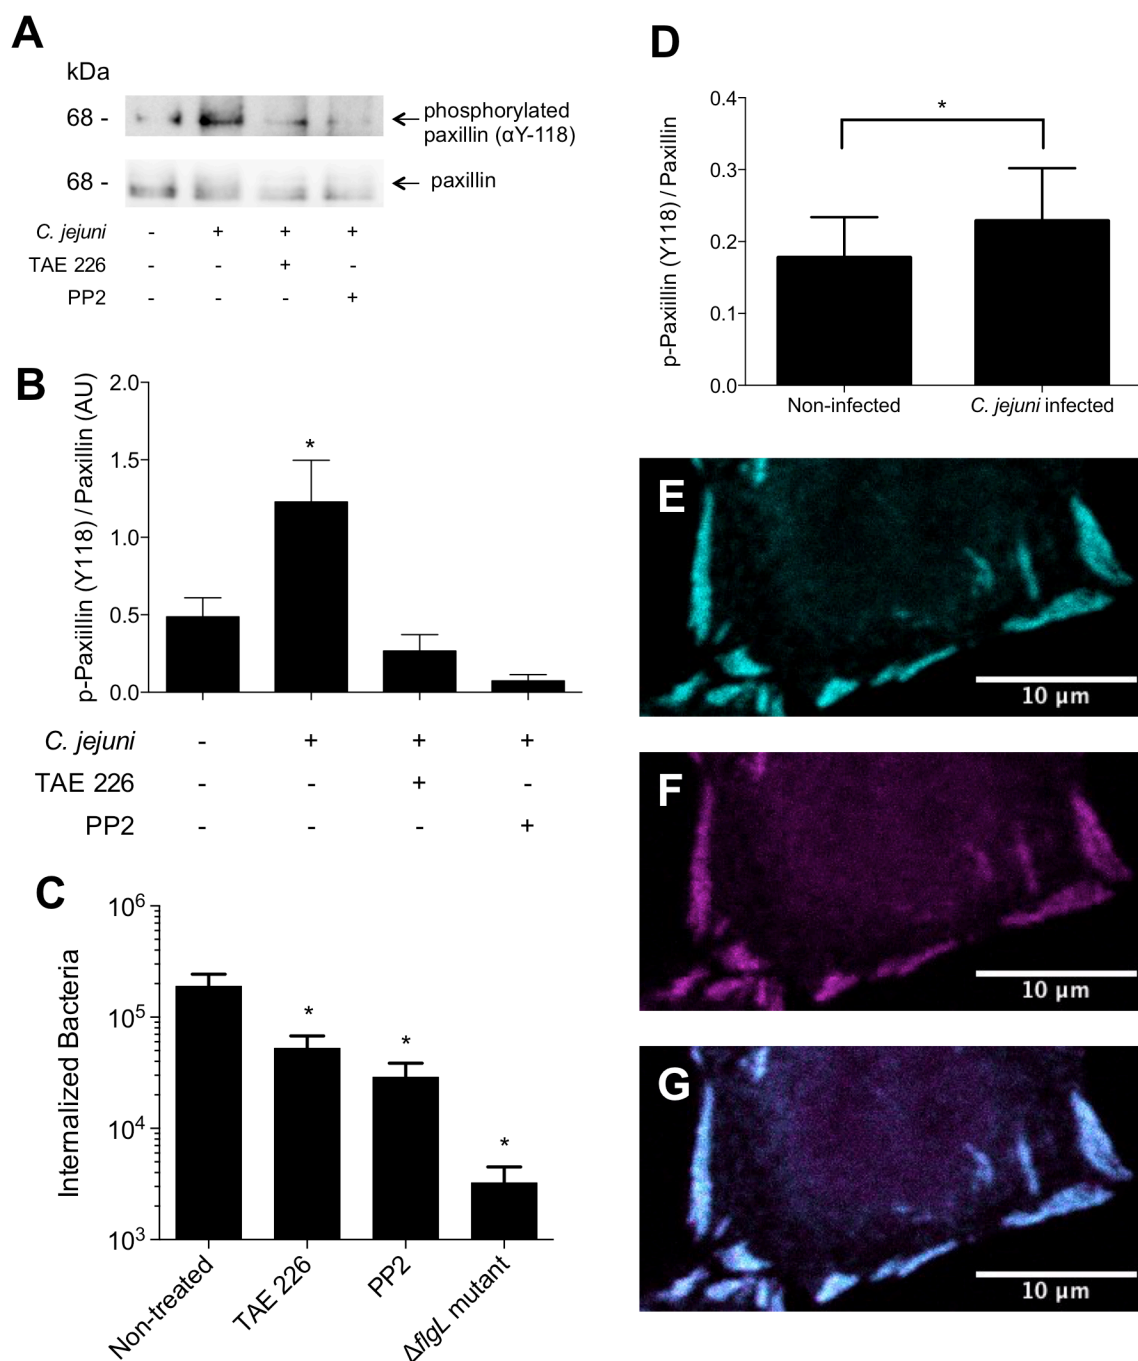

**Figure 7:** *C. jejuni* increases host cell adhesion strength. INT 407 cells were seeded 24 hours before infection with *C. jejuni* or treatment with 20  $\mu$ M nocodazole (a microtubule polymerization inhibitor that increases focal adhesion size and strength) for 45 minutes. Cells were treated with a low concentration of trypsin to induce cell rounding and then imaged every 5 to 30 seconds for 15 minutes. **A.** Rounded cells were counted at each minute after trypsin treatment and divided by the total number of cells. The number of rounded cells appearing per minute was faster in non-infected cells than *C. jejuni* and nocodazole treated cells, indicating increased adhesion strength in these conditions. Error bars represent SEM, \* indicated  $p < 0.05$  between *C. jejuni* and non-infected conditions (Two-way ANOVA, Sidak's multiple comparisons test). **B.** Images of cells treated with *C. jejuni*, nocodazole, or non-infected. In non-infected cells, most cells appear rounded at 9 minutes post-trypsin treatment, and all cells are rounded at 15 minutes. In nocodazole and *C. jejuni* infected conditions, fewer cells are rounded at 9 and 15 minutes. Scale bar represents 200  $\mu$ m.

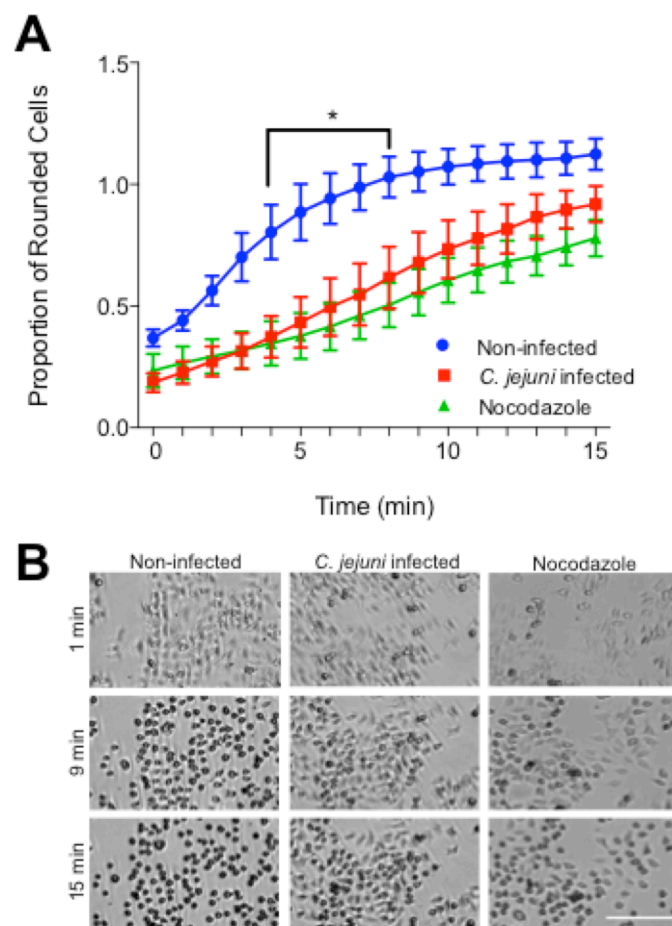

in an epithelial cell monolayer and imaged for 4 days to observe wound closure. There were no significant differences in cell number or percent viability between infected and non-infected conditions 6 days after scratching cells (data not shown). Non-infected monolayers healed almost completely in 4 days, while monolayers infected with *C. jejuni* did not (Figure 8). Linear regression analysis showed that non-infected scratches healed at a rate of  $0.0082 \pm 0.00063$  (normalized area/hour) while *C. jejuni* infected scratches healed significantly slower at  $0.0042 \pm 0.00046$  ( $p <$

0.0001, ANCOVA). The average initial wound size was not significantly different between samples ( $p = 0.315$ , Student's T Test). This result shows that *C. jejuni* significantly decreases the ability of the epithelial cell monolayer to heal wounds.

### *Mechanism of C. jejuni focal adhesion manipulation*

We have shown that *C. jejuni* manipulates the size, structure, and composition of focal adhesions. Based on previous research connecting *C. jejuni* adhesins to focal adhesion components (Konkel, Talukdar, Negretti, & Klappenbach, 2020; Krause-Gruszczynska et al., 2011; Monteville et al., 2003), we hypothesized that the CadF and FlpA adhesins could be responsible for driving the observed changes in the focal adhesion. First, we tested if the CadF and FlpA adhesins were required for signaling changes in the focal adhesion by examining paxillin phosphorylation. INT 407 cells were infected with *C. jejuni* wild-type strain, *C. jejuni* lacking the *cadF* and *flpA* genes ( $\Delta cadF \Delta flpA$ ), or the *C. jejuni*  $\Delta cadF \Delta flpA$  with the *cadF* and *flpA* genes restored ( $\Delta cadF \Delta flpA + cadF flpA$ ). Non-infected and *C. jejuni*  $\Delta flgL$  infected cells were used as negative controls. We observed an increase in paxillin phosphorylation with the wild-type strain but not with the  $\Delta flgL$  mutant (Figure 9A, Supplemental Figure 3), which is consistent with our previous results (Figure 5A-B). In addition, we observed a reduced level of phosphorylation in cells infected with the *C. jejuni*  $\Delta cadF \Delta flpA$  mutant when compared to cells infected with the *C. jejuni* wild-type strain, indicating that these adhesins are partially responsible for activating the signaling of paxillin.

To determine how CadF and FlpA may contribute to functional changes to the focal adhesion, we examined their role in individual and collective cell migration. Individual cell migration was tested using A549 epithelial cells. Cells were grown on a laminin-based extracellular matrix, infected with the *C. jejuni* isolates, and imaged for 5 hours to observe migration. In addition to testing the dependence on the adhesins, we wanted to test if metabolically active bacteria were required to limit host cell motility. Therefore, we added chloramphenicol (Cm) at 256 – 512  $\mu\text{g/ml}$ , a concentration known to decrease bacterial invasion but not viability (Negretti et al., 2019). We observed a significant decrease in cell processivity with the *C. jejuni* wild-type isolate (Figure 9B). Both the *C. jejuni*  $\Delta cadF \Delta flpA$  isolate and the addition of Cm partially restored processivity individually, and the combined use of both resulted in the highest level of restoration. In conjunction with the previous finding, these results indicate that the CadF and FlpA fibronectin-binding proteins and other factors contribute to *C. jejuni* focal adhesion modification.



**Figure 8:** *C. jejuni* decreases the rate of epithelial wound healing. T84 cells were grown until confluency then scratched by aspiration to create a small circular wound. Cells were infected with *C. jejuni* for three hours and then imaged twice daily for 4 days to monitor wound closure. **A.** Non-infected scratch immediately after wounding. **B.** Non-infected scratch 100 hours after wounding. **C.** *C. jejuni* infected scratch immediately after wounding. **D.** *C. jejuni* infected scratch 100 hours after wounding. Red lines outline the wound, and bars represent 0.5 mm. **E.** Average percent of initial wound size over time. The rate of closure is significantly lower for *C. jejuni* infected scratches compared to non-infected scratches (Non-infected =  $-0.0082 \pm 0.00063$ , *C. jejuni* infected =  $-0.0042 \pm 0.00046$ ,  $p < 0.0001$ , ANCOVA). Solid lines represent linear regression of points for each condition.

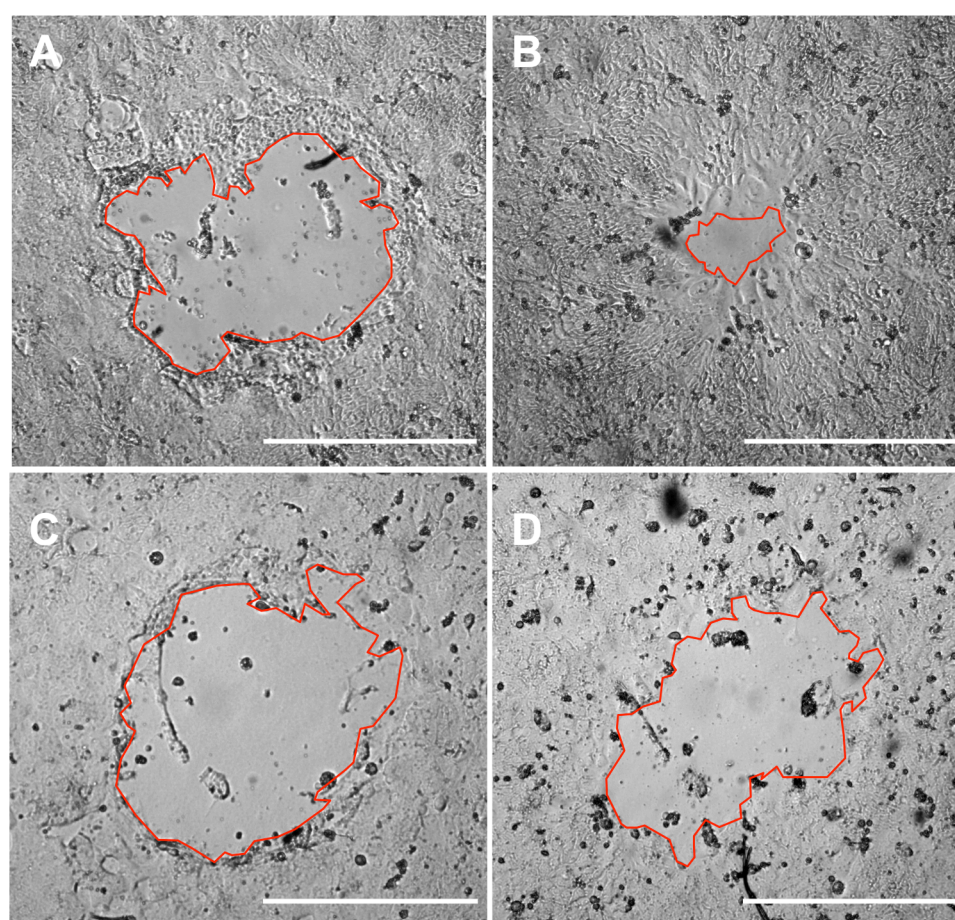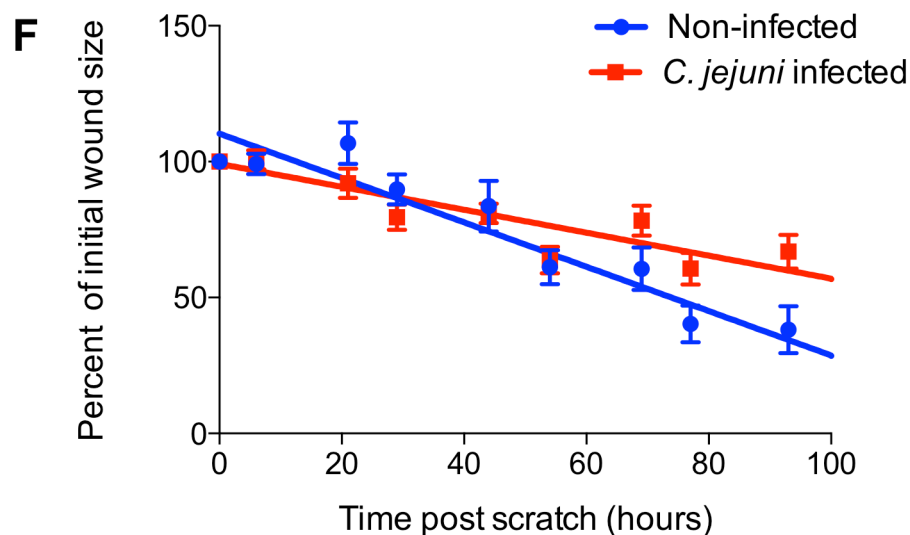

Lastly, we investigated the dependence of CadF and FlpA in collective cell migration. T84 cells were grown to confluency and then scratched by aspiration to create circular wound beds. Cells were infected with *C. jejuni* wild-type strain, *C. jejuni*  $\Delta cadF \Delta flpA$  mutant, and the *cadF flpA* complemented isolate. We observed a significantly decreased rate of scratch closure in *C. jejuni* wild-type infected cells compared to non-infected cells (Figure 9C-D). Further, we observed that the *C. jejuni*  $\Delta cadF \Delta flpA$  mutant had a rate of healing similar to the non-infected cells, while the complemented isolate restored the wild-type phenotype. Collectively, these results provide strong evidence that the CadF and FlpA adhesins contribute to the functional and physical changes in the focal adhesion.

**Figure 9:** The *C. jejuni* CadF and FlpA adhesins contribute to focal adhesion modification. **A.** INT 407 cells were infected with *C. jejuni* for 60 minutes then lysed. Protein gels were run with whole-cell lysates and immunoblots were probed for total paxillin and phosphorylated paxillin (Y118). Densitometry was performed to quantify band intensity and phosphorylated paxillin was normalized to total paxillin. 5 biological replicates were normalized to their wild-type condition and averaged. *C. jejuni* wild-type caused a significant increase in paxillin phosphorylation compared to the non-infected condition. The *C. jejuni*  $\Delta flgL$  (flagella hook-junction protein, mutant is non-motile and protein secretion negative) demonstrated low levels of phosphorylation, and the  $\Delta cadF \Delta flpA$  mutant and complement had a modest reduction in phosphorylation compared to cells infected with the *C. jejuni* wild-type strain. Error bars represent SD, \* indicates  $p < 0.05$  and \*\* indicates  $p < 0.001$  by one-way ANOVA with Dunnett's multiple comparison test. **B.** Migratory A549 cells were grown on a laminin-based extracellular matrix overnight then infected with *C. jejuni* wild-type strain or *C. jejuni*  $\Delta cadF \Delta flpA$  mutant with and without chloramphenicol (Cm) to inhibit protein synthesis. Cells were imaged for 5 hours to observe migration over time. Processivity was calculated to represent directional migration. Wild-type bacterial had significantly decreased processivity, however migration was partially restored by the addition of Cm and when the *C. jejuni*  $\Delta cadF \Delta flpA$  mutant was used. Use of both the adhesin mutant and Cm resulted in the biggest restoration of processivity. Bars represent the average of > 40 cells, error bars represent SEM, and different letters indicate groups with  $p < 0.05$  to other conditions by one-way ANOVA with Tukey's multiple comparison test. **C.** T84 cells were grown to confluency then scratched by aspiration to create a small circular wound. Cells were left non-infected or infected with *C. jejuni* wild-type strain, *C. jejuni*  $\Delta cadF \Delta flpA$  deletion mutant, or the *C. jejuni*  $\Delta cadF \Delta flpA$  + *cadF flpA* complemented isolate. Scratched cells were imaged twice daily for four days. Non-infected and *C. jejuni*  $\Delta cadF \Delta flpA$  infected scratches demonstrated a faster closure of the scratch than *C. jejuni* wild-type and *C. jejuni*  $\Delta cadF \Delta flpA$  + *cadF flpA* infected cells. 7 – 12 scratches per condition, error bars represent SEM, one of 2 biological replicates. **D.** Quantification of the rate of scratch closure for *C. jejuni* infected cells. Rate was determined by finding the slope of the line describing normalized scratch area over time for each scratch and averaged. Error bars represent SD, and \* indicates  $p < 0.01$ , and \*\* indicates  $p < 0.001$  compared to the non-infected condition by one-way ANOVA with Dunnett's multiple comparison test.

**Figure 9:** The *C. jejuni* CadF and FlpA adhesins contribute to focal adhesion modification.

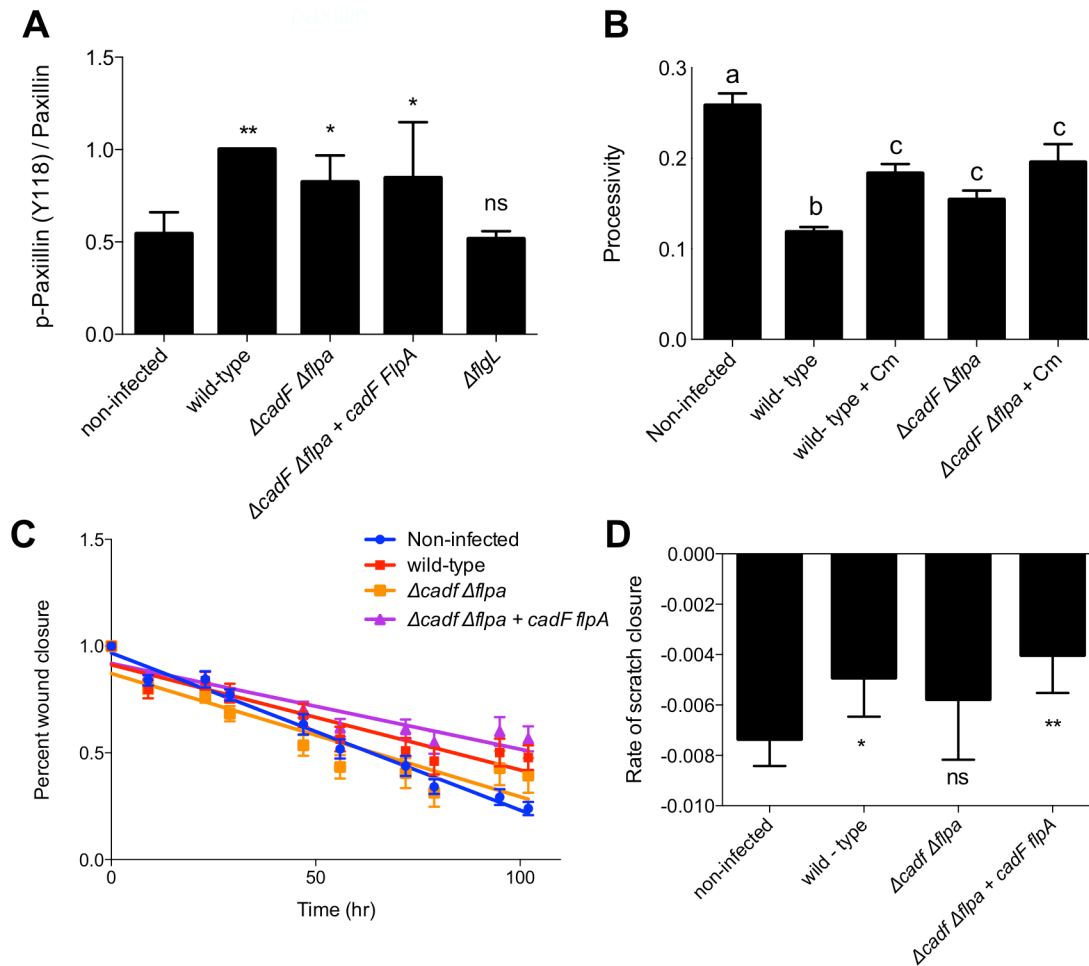

## DISCUSSION

The key findings of this study show that *C. jejuni* changes the structure, composition, and function of cellular focal adhesions using a combination of virulence factors. *C. jejuni* changes the focal adhesion structure by affecting paxillin footprint size, turnover rate, and nanoscale position. Since paxillin is a dynamic regulator of focal adhesion function, these alterations dramatically change host cell behavior. This was dependent on bacterial virulence factors, including the flagellum and the CadF and FlpA fibronectin-binding adhesins, and required the host cell FAK and Src kinases. The biological outcomes of such manipulations are that cell adhesion, cell motility, and epithelial sheet migration/wound healing were significantly altered by *C. jejuni* infection. The defects in cell motility are likely due to a disruption in the balanced lifecycle of focal adhesions. We propose that the purpose of taking over focal adhesions is driven by *C. jejuni* needing to utilize structural components for invasion. We have seen these changes by imaging both fixed and live cells, and, to the best of our knowledge, this is the first time *C. jejuni* has been shown to manipulate the structure and dynamics of the focal adhesion.

An organized balance between focal adhesion assembly and disassembly allows coordinated host cell motility. Research has shown that focal adhesion proteins exist in two states: the cytoplasmic pool, which diffuses quickly throughout the cell, and the focal adhesion, which diffuses much slower (Le Devedec et al., 2012). Focal adhesion proteins must assemble from the cytosolic pool to anchor the leading edge of the cell, then disassemble and detach from the trailing edge as the cell moves (Zaidel-Bar et al., 2007). It is the coordination of these processes that allow cells to have directional migration (Nagano et al., 2012). If focal adhesion turnover is greater than focal adhesion assembly, or if assembly is greater than turnover, cells will be non-motile (Nagano et al., 2012). We found that *C. jejuni* increases the size of the focal adhesion, suggesting that assembly may be occurring more than turnover. This is further supported by our observation that paxillin localization changes from the cytosol to the focal adhesion during infection. We also observed the focal adhesion to be thicker at the nanoscale level, again pointing to increased protein levels at the focal adhesion. Research has shown that focal adhesion size positively correlates with cell speed until an optimum is reached, at which point it negatively correlates (D. H. Kim & Wirtz, 2013). Based on our cell motility results, we hypothesize that during *C. jejuni* infection, the focal adhesion has increased past this optimum size, resulting in decreased processivity. Focal adhesion assembly and disassembly is a highly regulated process. In addition to the assembly and disassembly balance, individual proteins that compose focal adhesions are constantly joining and leaving the focal adhesion, with each individual component having a unique turnover rate and residency time (Le Devedec et al., 2012). We investigated the turnover of paxillin at focal adhesions to further understand how assembly was increased during *C. jejuni* invasion. Interestingly, we found that the turnover of paxillin was decreased in infected cells, suggesting that the increased size of the focal adhesion could be driven by slower turnover (longer residency time) of individual proteins. In support of this model, research has found that larger focal adhesions have an increased protein residency time (Le Devedec et al., 2012). We hypothesize that *C. jejuni* increases the focal adhesion footprint size by increasing the residency time of signaling proteins such as paxillin. The most common pathway for paxillin activation is through FAK and Src kinases.

The well-characterized FAK-Src signaling pathway is required for *C. jejuni* invasion and paxillin phosphorylation. FAK is a key regulator of focal adhesion dynamics, being implicated in both focal adhesion maturation and turnover (D. H. Kim & Wirtz, 2013). Upon integrins binding to fibronectin (Hamadi et al., 2005; Le Devedec et al., 2012; Mitra et al., 2005), FAK becomes activated by autophosphorylation on tyrosine 397. This creates a high-affinity SH2 docking site for Src kinase (Hamadi et al., 2005; Lietha & Eck, 2008; Mitra et al., 2005). Src then phosphorylates



other residues on FAK, and the now active kinase complex can phosphorylate many focal adhesion proteins, including paxillin (Mitra et al., 2005). We observed phosphorylation of paxillin at tyrosine 118. Phosphorylation at this site as well as at tyrosine 31 promotes nascent focal complex formation (Wu, 2007). Phosphorylated paxillin also has a higher affinity for FAK binding (Zaidel-Bar et al., 2007), creating a positive feedback loop to recruit more FAK to focal adhesions. Paxillin phosphorylation can also recruit downstream signaling intermediates such as Erk2 and CrkII (Mitra et al., 2005; Wu, 2007). The phosphorylated tyrosine residues on paxillin create high affinity SH2 binding sites for the CrkII adaptor protein (Schaller, 2001). This results in membrane ruffles via activation of Rac1 by CrkII association with the GEFs DOCK180 and ELMO (Valles, Beuvin, & Boyer, 2004; Zaidel-Bar et al., 2007). Rac1 has been shown to be activated during *C. jejuni* invasion of epithelial cells (Krause-Gruszczynska et al.; Negretti et al., 2021; Samuelson & Konkel, 2013), and DOCK180 is required for maximum invasion (Eucker & Konkel, 2012). We hypothesize that signaling through the focal adhesion leads to membrane ruffling and subsequent invasion. Another role for focal adhesion signaling through paxillin is by acting as a scaffold for Erk. Src-FAK phosphorylation of paxillin at Y118 can lead to Erk association (Mitra et al., 2005; Webb et al., 2004), and the MAP kinase cascade has been shown to be activated during *C. jejuni* infection (Eucker, Samuelson, Hunzicker-Dunn, & Konkel, 2014; MacCallum, Haddock, & Everest, 2005). Activation of host cell signaling has been shown to be dependent on *C. jejuni* invasion factors; therefore, we investigated what *C. jejuni* factors were driving changes in the focal adhesion.

We investigated both *C. jejuni* adhesins and the flagellum and observed that both are required to manipulate the focal adhesion. Regarding the adhesins, it is known that the CadF and FlpA adhesins set the stage for cell invasion by promoting the binding of the bacteria to the fibronectin localized on the basolateral surfaces of cells (Monteville & Konkel, 2002; Talukdar, Negretti, Turner, & Konkel, 2020). Further, both adhesins have been reported to stimulate host cell signaling pathways. CadF is required for both FAK phosphorylation (Krause-Gruszczynska et al., 2011) and paxillin phosphorylation (Monteville et al., 2003), and both CadF and FlpA are required for maximal activation of the MAP kinase cascade (Talukdar et al., 2020). Here, we showed that a double mutant of both the *cadF* and *flpA* genes had a modest reduction in paxillin phosphorylation compared to the wild-type strain, and that both adhesins are required for *C. jejuni* to negatively impact individual and collective cell migration. We also found that a function flagellum was required for *C. jejuni* to increase the size of the focal adhesion using an *flgL* mutant. FlgL is a flagellar hook junction protein required for motility and protein secretion (Neal-McKinney & Konkel, 2012). We propose a model whereby bacterial motility is required for the bacteria to penetrate the intestinal

cell barrier (Backert et al., 2013; Monteville & Konkel, 2002), followed by the CadF and FlpA adhesins promoting intimate contact of the bacteria and the host cells. This intimate contact permits the delivery of effector proteins via the flagellum to the target cell. Together, these virulence determinants work in coordination to manipulate the focal adhesion and modify cell behavior. This is consistent with our result that a combination of adhesin mutant bacteria and the use of chloramphenicol led to the highest restoration of individual cell motility. The requirement of both adhesins and effector proteins for host cell changes is also consistent with the established model of *C. jejuni* invasion (Konkel et al., 2020; Ó Cróinín & Backert, 2012).

It is common for bacterial pathogens to target the focal adhesion, due to the nature of focal adhesion in signaling between the extracellular matrix and the cytoskeleton. *Salmonella* Typhimurium is an extensively studied intestinal pathogen that invades host cells by secreting effector proteins into the cell. Several focal adhesion proteins have been implicated in *Salmonella* invasion. Shi et al. 2006 found that *Salmonella* recruits FAK, Cas, and paxillin to sites of bacterial invasion, creating focal adhesion-like structures. Interestingly, these structures form on the apical rather than basal cell surface of polarized cells and do not include beta integrins (Shi & Casanova, 2006). This is in contrast to *C. jejuni*, where we observed an increase in the size of preexisting focal adhesions rather than the creation of new focal adhesion-like structures surrounding the bacterium. Furthermore, Shi et al. found that FAK and Cas are required for bacterial invasion but that the catalytic domains of FAK are not (Shi & Casanova, 2006). In agreement with this observation, inhibition of Src kinase by PP2 did not decrease invasion (Shi & Casanova, 2006). This is again in contrast to the results we observed with *C. jejuni*, where the catalytic activity of Src and FAK are required for invasion and paxillin phosphorylation. Previous research has also shown that talin and  $\alpha$ -actinin, structural components of the focal adhesion, assemble at sites of *Salmonella* bacterial invasion (Finlay, Ruschkowski, & Dedhar, 1991). It is still unknown what effectors are responsible for the recruitment of FAK and Cas (Ly & Casanova, 2007) and how the pathway connects to invasion. However, a recent study has shown that in macrophages, SPI-2 effector proteins target FAK to avoid fusion of the *Salmonella* containing vacuole with the lysosome (Owen, Meyer, Bouton, & Casanova, 2014). In addition, *S. Typhimurium* infection of bone marrow-derived macrophages causes irregular movement and decreased directional movement. This is dependent on Sse1, an effector of SPI-2 (McLaughlin et al., 2009). This result is consistent with our finding that *Salmonella* decreased the processivity of A549 epithelial cells. While macrophages utilize podosomes rather than focal adhesions for motility, many of the regulatory proteins, such as FAK and paxillin, are involved in both (Pokharel et al., 2019).

We observed by the trypsin detachment assay that *C. jejuni* increases focal adhesion attachment strength. The epithelial cells of intestinal villi are regularly shed by cell extrusion and programmed cell death at the villi tips. New cells migrating up from the crypts then replace these lost cells. An equilibrium between division and migration from the crypts and shedding at the tips keeps the number of cells constant (Williams et al., 2015). Many pathogens take advantage of this natural process to cause disease. *Listeria monocytogenes* invade the villi at sites of extrusion, taking advantage of the briefly available E-cadherin (Pentecost, Otto, Theriot, & Amieva, 2006). Other enteric pathogens block extrusion to prevent infected cells from being shed (Gudipaty & Rosenblatt, 2017). The OspE effector, which is conserved in *Shigella flexneri*, EPEC, EHEC, *Salmonella*, and *Citrobacter rodentium*, interacts with integrin linked kinase (ILK) to block epithelial cell turnover and increase cell adhesion to the matrix (Gudipaty & Rosenblatt, 2017; M. Kim et al., 2009). In addition, this interaction decreases wound healing, blocks focal adhesion turnover, and increases the number of focal adhesions (Gudipaty & Rosenblatt, 2017; M. Kim et al., 2009). This is consistent with our observations that *C. jejuni* increases adhesion strength, decreases turnover, and blocks migration. However, OspE interaction with ILK causes a decrease in paxillin and FAK phosphorylation, suggesting that the pathway by which *C. jejuni* causes these changes varies from the OspE pathway. Pathogens often increase host focal adhesion strength to prevent cell extrusion from the villi. This manipulation can be two-fold, as altering focal adhesion dynamics can also prevent the villi from healing.

The piglet model of *C. jejuni* disease has shown that infection results in cell necrosis and villus blunting (Konkel et al., 2001). The process of repairing damage such as this is termed restitution, and has been well studied (Albers et al., 1995; Lacy, 1988; Lotz et al., 2000; Moore et al., 1989; Ziegler et al., 2016). Most research has been done on wounds created by ischemia, viral infection, parasites, or chemicals (Albers et al., 1995). However, villus blunting and denuding as the epithelium lifts from the basement membrane is common in all of these agents (Albers et al., 1995; Moore et al., 1989; Stieler Stewart, Freund, Blikslager, & Gonzalez, 2018; Ziegler et al., 2016). Several sequential steps are involved in repairing villi damage. First, the villus contracts to shed damaged cells (Sumagin, Robin, Nusrat, & Parkos, 2013; Ziegler et al., 2016). Next, viable cells depolarize and flatten, extending lamellipodia membrane protrusions into the damaged area (Albers et al., 1995; Lacy, 1988; Lotz et al., 2000; Moore et al., 1989; Ziegler et al., 2016). These cells then migrate to cover the damaged area. This process is dependent upon focal adhesions assembling on the leading edge of the cell and disassembling to detach from the trailing end, similar to single cell motility (Ziegler et al., 2016). Finally, tight junctions are restored as the villi

wound closes (Lacy, 1988; Ziegler et al., 2016). For *in vitro* studies, T84 cells are commonly used (Brest et al., 2004; Lotz et al., 2000; Sumagin et al., 2013). We observed that *C. jejuni* decreases the collective migration of T84 cells (wound healing) and hypothesize that this is due to focal adhesion manipulation. In support of this hypothesis, this effect has been observed in *E. coli*. The cytotoxic necrotizing factor 1 (CNF1) from *E. coli* has been shown to decrease T84 wound healing (Brest et al., 2004). CNF1 has also been shown to cause paxillin and FAK phosphorylation, further supporting the idea that migration is blocked due to manipulation of focal adhesion components (Brest et al., 2004).

We have laid the groundwork for understanding how *C. jejuni* manipulates the focal adhesion during infection by performing a mechanistic study focusing on the functions of focal adhesions. We observed that the focal adhesion size, Z position, and thickness increase in response to infection. To understand the mechanism of this change, we investigated the role of a prominent focal adhesion pathway: FAK and Src kinase activation. Consistent with the literature, we observed that the kinase activity of FAK and Src is needed to phosphorylate paxillin. This phosphorylated paxillin is localized to focal adhesions and likely plays a role in downstream signaling. We also looked at the turnover of paxillin at the focal adhesion, and saw that it was significantly decreased. This provides a mechanism for the focal adhesion size increase. Motility and adhesion, the two main functions of the focal adhesion aside from signaling, were altered by *C. jejuni*. We predict that by altering these parameters, *C. jejuni* can more efficiently infect the intestine of a host, thereby increasing the duration and severity of sickness. Further research is needed to understand how focal adhesion manipulation is directed towards early-infection signaling to allow invasion and late-infection manipulation to prolong sickness in a host.

## MATERIALS AND METHODS

### Bacterial strains and growth conditions

*Campylobacter jejuni* strain 81-176 was cultured on Mueller-Hinton agar (Hardy Diagnostics, Santa Maria, CA, United States) containing 5% citrated bovine blood (MHB agar) under microaerobic (10.5% CO<sub>2</sub>) conditions at 37° C in a Napco 8000WJ incubator (Thermo Fisher, Waltham, MA, United States). The bacteria were subcultured on MHB agar every 24 to 48 hours. Before infection of cultured epithelial cells, *C. jejuni* were grown overnight on a MHB plate overlaid with MH broth (biphasic conditions). *Salmonella enterica* serovar Typhimurium (S. Typhimurium) SL1344 and *Staphylococcus aureus* ATCC 25923 were cultured on LB agar and LB broth as needed. Prior to

use, the *Salmonella* was diluted 1:80 and grown for 2.5 hours to reach log phase, which corresponded to an OD<sub>600</sub> of ~0.8 (C. A. Lee & Falkow, 1990).

### **Generation and culture of a *C. jejuni* deletion mutants and complemented isolates**

The *C. jejuni* 81-176 *flgL* mutant and complemented isolate were generated as outlined elsewhere (Negretti et al., 2019). The *C. jejuni* 81-176  $\Delta cadF \Delta flpA$  mutant and complemented isolate were generated as described elsewhere (Talukdar et al., 2020). The *flgL* mutant and  $\Delta cadF \Delta flpA$  mutant were passaged on MHB agar plates supplemented with 8 µg/mL of chloramphenicol and the *flgL* complemented isolate and *cadF flpA* complemented isolate were passaged on MHB agar plates supplemented with 250 µg/mL of hygromycin B.

### **Cell Lines**

Epithelial INT 407 (ATCC CCL-6), epithelial lung carcinoma A549 (ATCC CCL-185), epithelial colonic carcinoma T84 (ATCC CCL-248), and rat bladder carcinoma cell line 804G were cultured in Minimal Essential Media (MEM; Gibco, Grand Island, NY, United States) supplemented with 10% fetal bovine serum (FBS; Heat Inactivated Seradigm Premium Grade Fetal Bovine Serum, VWR, Radnor, PA) and 1 mM sodium pyruvate (Corning Inc., Manassas, VA, United States) at 37° C with 5% CO<sub>2</sub>. The A549 and 804G cells were a kind gift of Jonathan C. R. Jones (WSU, Pullman, WA).

### **Immunofluorescence microscopy**

INT 407 cells were seeded onto glass coverslips in a 24 or 6 well dish approximately 24 hours before infection. Cells were seeded at  $3 \times 10^4$  cells/well for 24-well dishes or  $1.5 \times 10^5$  cells/well for 6 well dishes. *C. jejuni* was collected from biphasic conditions and adjusted to an OD<sub>540</sub> of 0.1 in MEM supplemented with 1% FBS. Cells were rinsed once with 1% FBS MEM before adding *C. jejuni* and then incubated at 37° C in 5% CO<sub>2</sub> for 60 minutes unless otherwise indicated. Following incubation, cells were fixed with 4% paraformaldehyde for 5 to 10 minutes. Cells were then rinsed and permeabilized with 0.1% Triton X-100 in PBS containing 0.3% bovine serum albumin. *C. jejuni* was stained using a polyclonal rabbit anti-*C. jejuni* antibody (1:4000), paxillin was stained with a mouse anti-paxillin antibody (1:250, BD Biosciences, San Jose, CA), and phospho-paxillin was stained with a rabbit anti-phospho-paxillin antibody (Y118, 1:50, Cell Signaling Technologies). Secondary antibodies that were used for visualization included an Alexa Fluor 680 conjugated anti-rabbit antibody (1:1000, Jackson ImmunoResearch, West Grove, PA) and an Alexa Fluor 594 conjugated anti-mouse antibody (1:1000, Jackson ImmunoResearch). Where necessary, actin was

stained with FITC conjugated phalloidin (1:1000, Sigma-Aldrich, St. Louis, MO). Images of cells infected with *C. jejuni* were taken with a confocal microscope (Leica Microsystems TCS SP5 and a Leica Microsystems TCS SP8 with LIGHTNING). Images were quantified with Fiji. To measure focal adhesion size, the paxillin channel was used. The background was subtracted and a threshold was set that included only focal adhesions greater than  $0.25 \mu\text{m}^2$ . Focal adhesions from all images were combined to ensure >1000 focal adhesions were analyzed per condition. Focal adhesions greater than 7 standard deviations away from the mean were removed from subsequent analysis. For quantification of paxillin localization, the *C. jejuni* channel was removed, and images were randomized and blinded. Images were scored based on paxillin localization (0 = paxillin at the focal adhesion, 2 = paxillin in the cytosol) by a trained individual who did not help in image acquisition. For phospho-paxillin, the focal adhesion location was measured as described above, then all focal adhesions were added to the region of interest (ROI) manager. The intensity (mean gray value) of the paxillin and phospho-paxillin channel at the focal adhesions was measured from the ROI manager. Then, the phospho-paxillin intensity was divided by the paxillin intensity at each focal adhesion.

### **iPALM microscopy**

iPALM images were captured using a similar procedure as described previously (Kanchanawong et al., 2010). Briefly, INT 407 cells were seeded on a gold fiducial coated coverslip and grown overnight prior to transfection with a tdEos-Paxillin expressing plasmid using Lipofectamine 3000. Approximately 18 hours after transfection, the cells were infected with *C. jejuni* that was collected from a biphasic culture and adjusted to an  $\text{OD}_{540}$  of 0.3. The cells were infected for 45 minutes prior to fixation in 0.4% paraformaldehyde and 0.1% glutaraldehyde in PBS for 5 minutes. Samples were washed with PBS and quenched with 1%  $\text{NaBH}_4$ . Immunostaining for *C. jejuni* was performed as described above. Images were taken with a laser power intensity of  $2 \text{ kW}/\text{cm}^2$  and an exposure time of 50 ms. The number of frames acquired per image was 25000. Peakselector software was used to localize data, perform drift correction, and to render images.

### **iPALM data processing**

ImageJ was used to process the image output files. Focal adhesions were selected from two-dimensional tiff outputs of iPALM images by smoothing the image (Gaussian blur), thresholding, and analyzing particles greater than  $0.5 \mu\text{m}^2$  in order to generate regions of interest (ROI). The ROI data was used to process the data output from iPALM imaging in R Studio. A LOESS (locally



estimated scatterplot smoothing) regression was performed on the gold fiducials. All fluorophores were normalized to their nearest neighbor of the LOESS regression. The Z position of all fluorophores within a focal adhesion, as determined by each ROI, was averaged. Focal adhesions with Z positions calculated as less than 0 nm were removed from further analysis. Then fluorophores with Z positions less than 0 nm were removed. The average Z position of all focal adhesions was determined and compared between non-infected and *C. jejuni* infected cells. The thickness of the focal adhesion was determined as the inner quartile range (75<sup>th</sup> percentile minus 25<sup>th</sup> percentile) of all fluorophores within a focal adhesion.

### **Live cell imaging to determine cell adhesion strength**

INT 407 cells were seeded onto 35 mm tissue culture petri dishes at  $4.5 \times 10^5$  cells/dish approximately 24 hours before infection, with three dishes per condition. For some experiments, cells were seeded in a 24-well dish at  $9.4 \times 10^4$  cells/well and eight wells were used per condition. *C. jejuni* from a biphasic culture was adjusted to an OD<sub>540</sub> of 0.375 in 1% FBS MEM. Cells were rinsed once with 1% FBS MEM before adding the *C. jejuni*. For nocodazole treated cells, 20 nM of nocodazole in 1% FBS MEM was added to cells after rinsing. For non-infected cells, 1% FBS MEM alone was added. Cells were incubated for 45 minutes at 37° C before imaging. Cells were rinsed once with PBS, then a low concentration (0.05%) of trypsin with 684.4 μM EDTA was added to induce cell rounding. A phase-contrast microscope (Nikon Eclipse TE2000-U) was used to capture an image every 5 to 30 seconds. Images were collected for 16 minutes. At each minute, rounded cells were identified by the Trainable Weka Segmentation Fiji plugin or Ilastik trainable image segmentation software trained to identify rounded cells. The number of rounded cells each minute was divided by the total number of cells counted in the first image.

### **A549 Motility**

To collect the extracellular matrix, 804G cells were grown to confluency and incubated for 6 days. The supernatant (conditioned medium) was collected, spun, filtered, and frozen until use. 12 well dishes were coated with the 804G conditioned media for 2 to 4 hours, then rinsed with PBS before seeding A549 cells at a density of  $7.5 \times 10^3$  cells/well 16-20 hours before infection. Experiments were conducted on an automated Leica DMI8 microscope with a heated stage. *C. jejuni* were collected from a biphasic culture and the OD<sub>540</sub> was adjusted to 0.1 in 10% FBS MEM. For some experiments, the 10% FBS MEM was made with reduced sodium bicarbonate (1.2 mM) and 10 mM HEPES. For some experiments with the *C. jejuni*  $\Delta cadF \Delta flpA$  mutant and *cadF flpA* complement

isolate, cells were pre-incubated with 1 mL of 0.1% FBS MEM for 30 minutes, then 0.5 mL of 30% FBS MEM was added immediately prior to imaging to bring the total concentration of FBS to 10%. For experiments with chloramphenicol, the bacteria were incubated for 30 minutes prior to cell infection with the drug to reduce invasion but not bacterial viability [256 µg/ml or 512 µg/ml (Konkel, Corwin, Joens, & Cieplak, 1992; Negretti et al., 2019)]. Chloramphenicol was maintained for the duration of the infection and imaging. Cells were imaged for five hours, with one image taken every 5 minutes. Images were processed with an in-house localization software and the TrackMate Fiji plugin. All code used to process the images is available as open-source software at <https://github.com/nimne/ACIT>. Statistical analysis and wind rose plots were done using R. Processivity was calculated as path distance divided by total displacement every 5 minutes, and averaged for all cells. For experiments using *S. Typhimurium* and *S. aureus*, A549 cells were preincubated with bacteria in 10% FBS MEM with 26.2 mM sodium bicarbonate for 60 minutes in a 5.5% CO<sub>2</sub> 37° C incubator. Cells were then rinsed 3 times with PBS to remove excess bacteria, then imaged as described above in low sodium bicarbonate 10% FBS MEM. Cells were infected with approximately  $2.4 \times 10^8$  CFU of *S. Typhimurium* and *S. aureus*. Chloramphenicol (GoldBio, St. Louis, MO) was added to prevent bacterial replication during the assay (*S. Typhimurium* = 8 µg/mL and *S. aureus* = 64 µg/mL).

### **Paxillin immunoprecipitation for inhibitor experiments**

INT 407 cells were seeded at a density of  $6 \times 10^5$  cells/well in six-well tissue culture trays and incubated at 37°C in a humidified, 5% CO<sub>2</sub> incubator overnight. Cells were rinsed with MEM lacking FBS and infected with the *C. jejuni* wild-type strain and *flgL* mutant at an OD<sub>540</sub> of 0.3 and incubated for 45 min. After the incubation, the cells were rinsed three times with ice-cold PBS and lysed by the addition of ice-cold IP lysis buffer [25 mM Tris-HCl pH 7.5, 1 mM EDTA, 50 mM NaF, 150 mM NaCl, 5% glycerol, 1% Triton X-100, 1x Protease Inhibitor Cocktail (Sigma), 1 mM Na<sub>3</sub>VO<sub>4</sub>, and 1x Halt™ Phosphatase Inhibitor Cocktail (Thermo Scientific, USA)] and incubated for 20 min on ice. The lysate was clarified by centrifugation at 14,000 rpm for 15 min at 4° C. Immunoprecipitation was performed by incubating mouse anti-Paxillin antibody (1:250, BD Biosciences, USA) with the lysate overnight at 4° C followed by addition of Protein A/G PLUS-Agarose beads (Santa Cruz Biotechnology, Dallas, TX) and incubation for 2 hours at 4° C. The precipitate was rinsed four times with ice-cold IP wash buffer (20 mM HEPES, 150 mM NaCl, 50 mM NaF, 1 mM Na<sub>3</sub>VO<sub>4</sub>, 0.1% Triton X-100, 10% glycerol, 1x Protease Inhibitor Cocktail, 1 x phosphatase inhibitor cocktail). Samples were analyzed by SDS-PAGE and immunoblot analysis,



as outlined previously (Monteville et al., 2013). Immunoblot detection of phosphorylated paxillin was performed using a 1:2000 dilution of a mouse anti-phospho-paxillin (Y-118) (Cell Signaling Technology, Danvers, MA) antibody. Detection of the total pool of paxillin was performed using a 1:1000 dilution of a mouse anti-paxillin antibody and a 1:4000 dilution of a peroxidase-conjugated rabbit anti-mouse IgG.

### **Paxillin phosphorylation for *cadF flpA* deletion mutant experiments**

INT 407 cells were seeded at  $3.6 \times 10^6$  cells/well in 100 cm<sup>2</sup> dishes or  $9.2 \times 10^4$  cells/well in 24-well dishes 20-28 hours prior to infection. Cells were rinsed with MEM lacking FBS one time and then incubated with MEM lacking FBS for 3 to 4 hours. *C. jejuni* was collected from a biphasic culture, and the OD<sub>540</sub> was adjusted to 0.035. The *C. jejuni* suspension was added in a volume equal to that of the volume in the well used for the serum starve. After 60 minutes of infection, cells were treated with a lysis buffer [25 mM Tris HCl, 150mM NaCl, 5% glycerol, 1% Triton X-100, 1x protease inhibitor cocktail (Thermo Scientific), and 2x phosphatase inhibitor cocktail (Thermo Scientific)] on ice for 10 minutes before collection of cell lysates by scraping. For experiments in 24-well dishes, cells were lysed with 2x Sample Buffer on ice for 5 minutes before collection. Lysate samples were analyzed by SDS-PAGE and immunoblot analysis, as outlined previously (Monteville et al., 2013). Immunoblot detection of phosphorylated paxillin was performed using a 1:1000 dilution of a mouse anti-phospho-paxillin (Y-118) (Cell Signaling Technology, Danvers, MA) antibody. Detection of the total paxillin was performed using a 1:1000 dilution of a mouse anti-paxillin antibody. A 1:4000 dilution of a peroxidase-conjugated rabbit anti-mouse IgG was used to detect both primary antibodies.

### **Binding and internalization assays**

*C. jejuni* binding and internalization assays were performed with INT 407 cells, as outlined elsewhere (Konkel et al., 1992). All assays were performed at a multiplicity of infection (MOI) ranging between 50 and 500, and repeated a minimum of 3 times to ensure reproducibility. The reported values represent the mean counts  $\pm$  standard deviations derived from quadruplicate wells. To test the effect of FAK and Src inhibition on *C. jejuni* cell invasion, INT 407 cells were pre-incubated for 30 min in MEM containing 5  $\mu$ M of TAE 226 (Selleck Chemicals, Houston, TX) or 10  $\mu$ g/mL of PP2 (Sigma) in 0.5 mL of medium. Following incubation, a 0.5 mL suspension of *C. jejuni* in MEM was added to each well and the binding and internalization assays performed using standard laboratory protocols. To determine if a drug affected the viability of the INT 407 cells, the

cells were rinsed twice with PBS following inhibitor treatment, stained with 0.5% trypan blue for 5 min, and visualized with an inverted microscope.

### Measurement of paxillin turnover

INT 407 cells were seeded at  $1.5 \times 10^5$  cells/well in glass-bottomed tissue culture dishes. The next day, cells were transfected with a tdEos-Paxillin expressing plasmid using Lipofectamine 3000 transfection reagents and incubated 16-20 hours. *C. jejuni* was collected from a biphasic culture, and the OD<sub>540</sub> was measured. *C. jejuni* was diluted in 10% FBS MEM with 1.2 mM sodium bicarbonate and 10 mM HEPES to an OD<sub>540</sub> of 0.25. Cells were incubated with *C. jejuni* or medium alone for approximately 60 minutes before imaging. Cells were imaged with a point scanning confocal microscope with a heated stage (Leica Microsystems TCS SP8X). Individual cells were selected, and one-half of the cell was photoswitched with a 405 nm laser. The cell was imaged every five seconds for 300 seconds after photoswitching. Multiple cells were imaged to ensure greater than 50 focal adhesions were examined. Images were analyzed with Fiji. At each  $>0.25 \mu\text{m}^2$  focal adhesion, the intensity of red fluorescence was measured in every frame. The slope of the red fluorescence in the non-photoswitched half of the cell was calculated by linear regression analysis.

### Collective cell migration

T84 cells were seeded at  $2.25 \times 10^5$  cells well in 24-well tissue culture dishes. Cells were given fresh 10% FBS MEM every day until confluency was reached (7-12 days). Cells were scratched by aspiration with a gel-loading or 0.1 – 2 uL tip. Immediately following scratching, cells were infected with *C. jejuni*. *C. jejuni* from a biphasic culture was adjusted to an OD<sub>540</sub> of 0.3 in 1% FBS MEM and added to cells for 3 hours. After infection, the medium was replaced with 1% FBS MEM. Scratches were imaged with a phase contrast microscope 1 - 2 times daily, and the medium was replaced every day for four days to monitor wound healing. 1% FBS MEM was used to prevent cell replication into the scratches. 6 to 12 scratches were averaged for all conditions. The reported values for linear regression slopes represent the mean counts  $\pm$  SEM.

### Statistical Analysis

All statistical analysis was done in GraphPad Prism v6.0a or R 3.5.1. All experiments were repeated a minimum of three times on separate days to constitute biological replicates. One of three replicates is shown for each figure unless otherwise noted.

## **ACKNOWLEDGMENTS**

We thank Colby Corneau for assistance with gentamicin-protection assays and paxillin phosphorylation analysis, Lauren Breymeyer, Jenna Lounsbery, and Abigail Hicks for assistance in the analysis of the microscopy images, and Satya Khuon (AIC Janelia) for technical help and advice. We also thank Dr. Prabhat Talukdar, Kyrach L. Turner, and Brianne Jones for proofreading this manuscript.

## **COMPETING INTERESTS**

The authors declare that the research was conducted in the absence of any commercial or financial relationships that could be construed as a potential conflict of interest.

## **SUPPORT**

This research was supported, in part, by a grant from the National Institutes of Health to Dr. Konkel (Award Number R01AI125356). The content is solely the responsibility of the authors and does not necessarily represent the official views of the NIH. iPALM data used in this publication was produced in collaboration with the Advanced Imaging Center, a facility jointly supported by the Gordon and Betty Moore Foundation and Howard Hughes Medical Institute at the Janelia Research Campus.

## REFERENCES

- Albers, T. M., Lomakina, I., & Moore, R. P. (1995). Fate of polarized membrane components and evidence for microvillus disassembly on migrating enterocytes during repair of native intestinal epithelium. *Lab Invest*, 73(1), 139-148.
- Argudin, M. A., Mendoza, M. C., & Rodicio, M. R. (2010). Food poisoning and *Staphylococcus aureus* enterotoxins. *Toxins (Basel)*, 2(7), 1751-1773. doi: 10.3390/toxins2071751
- Backert, S., Boehm, M., Wessler, S., & Tegtmeyer, N. (2013). Transmigration route of *Campylobacter jejuni* across polarized intestinal epithelial cells: paracellular, transcellular or both? *Cell Commun Signal*, 11, 72. doi: 10.1186/1478-811X-11-72
- Bhavsar, A. P., Guttman, J. A., & Finlay, B. B. (2007). Manipulation of host-cell pathways by bacterial pathogens. *Nature*, 449(7164), 827-834. doi: 10.1038/nature06247
- Biswas, D., Itoh, K., & Sasakawa, C. (2000). Uptake pathways of clinical and healthy animal isolates of *Campylobacter jejuni* into INT-407 cells. *FEMS Immunol Med Microbiol*, 29(3), 203-211. doi: 10.1111/j.1574-695X.2000.tb01524.x
- Black, R. E., Levine, M. M., Clements, M. L., Hughes, T. P., & Blaser, M. J. (1988). Experimental *Campylobacter jejuni* infection in humans. *J Infect Dis*, 157(3), 472-479. doi: 10.1093/infdis/157.3.472
- Boehm, M., Krause-Gruszczynska, M., Rohde, M., Tegtmeyer, N., Takahashi, S., Oyarzabal, O. A., & Backert, S. (2011). Major host factors involved in epithelial cell invasion of *Campylobacter jejuni*: role of fibronectin, integrin beta1, FAK, Tiam-1, and DOCK180 in activating Rho GTPase Rac1. *Front Cell Infect Microbiol*, 1, 17. doi: 10.3389/fcimb.2011.00017
- Brest, P., Turchi, L., Le'Negrato, G., Berto, F., Moreilhon, C., Mari, B., . . . Hofman, P. (2004). *Escherichia coli* cytotoxic necrotizing factor 1 inhibits intestinal epithelial wound healing in vitro after mechanical injury. *Infect Immun*, 72(10), 5733-5740. doi: 10.1128/IAI.72.10.5733-5740.2004
- Colburn, Z. T., & Jones, J. C. (2017).  $\alpha_6\beta_4$  integrin regulates the collective migration of epithelial cells. *Am J Respir Cell Mol Biol*, 56(4), 443-452. doi: 10.1165/rcmb.2016-0313OC
- Colburn, Z. T., & Jones, J. C. R. (2018). Complexes of  $\alpha_6\beta_4$  integrin and vimentin act as signaling hubs to regulate epithelial cell migration. *J Cell Sci*, 131(14). doi: 10.1242/jcs.214593
- Colonne, P. M., Winchell, C. G., & Voth, D. E. (2016). Hijacking host cell highways: Manipulation of the host actin cytoskeleton by obligate intracellular bacterial pathogens. *Front Cell Infect Microbiol*, 6, 107. doi: 10.3389/fcimb.2016.00107
- Critchley, D. R., & Gingras, A. R. (2008). Talin at a glance. *J Cell Sci*, 121(Pt 9), 1345-1347. doi: 10.1242/jcs.018085
- de Souza Santos, M., & Orth, K. (2015). Subversion of the cytoskeleton by intracellular bacteria: lessons from *Listeria*, *Salmonella* and *Vibrio*. *Cell Microbiol*, 17(2), 164-173. doi: 10.1111/cmi.12399
- Deakin, N. O., & Turner, C. E. (2008). Paxillin comes of age. *J Cell Sci*, 121(Pt 15), 2435-2444. doi: 10.1242/jcs.018044
- Efstathiou, J. A., & Pignatelli, M. (1998). Modulation of epithelial cell adhesion in gastrointestinal homeostasis. *Am J Pathol*, 153(2), 341-347. doi: 10.1016/S0002-9440(10)65576-9
- Eucker, T. P., & Konkel, M. E. (2012). The cooperative action of bacterial fibronectin-binding proteins and secreted proteins promote maximal *Campylobacter jejuni* invasion of host cells by stimulating membrane ruffling. *Cell Microbiol*, 14(2), 226-238. doi: 10.1111/j.1462-5822.2011.01714.x
- Eucker, T. P., Samuelson, D. R., Hunzicker-Dunn, M., & Konkel, M. E. (2014). The focal complex of epithelial cells provides a signalling platform for interleukin-8 induction in response to bacterial pathogens. *Cell Microbiol*, 16(9), 1441-1455. doi: 10.1111/cmi.12305

- Finlay, B. B., Ruschkowski, S., & Dedhar, S. (1991). Cytoskeletal rearrangements accompanying salmonella entry into epithelial cells. *J Cell Sci*, 99 ( Pt 2), 283-296.
- Fokkelman, M., Balcioglu, H. E., Klip, J. E., Yan, K., Verbeek, F. J., Danen, E. H., & van de Water, B. (2016). Cellular adhesome screen identifies critical modulators of focal adhesion dynamics, cellular traction forces and cell migration behaviour. *Sci Rep*, 6, 31707. doi: 10.1038/srep31707
- Grant, C. C., Konkel, M. E., Cieplak, W., Jr., & Tompkins, L. S. (1993). Role of flagella in adherence, internalization, and translocation of *Campylobacter jejuni* in nonpolarized and polarized epithelial cell cultures. *Infect Immun*, 61(5), 1764-1771.
- Gudipaty, S. A., & Rosenblatt, J. (2017). Epithelial cell extrusion: Pathways and pathologies. *Semin Cell Dev Biol*, 67, 132-140. doi: 10.1016/j.semcdb.2016.05.010
- Hamadi, A., Bouali, M., Dontenwill, M., Stoeckel, H., Takeda, K., & Ronde, P. (2005). Regulation of focal adhesion dynamics and disassembly by phosphorylation of FAK at tyrosine 397. *J Cell Sci*, 118(Pt 19), 4415-4425. doi: 10.1242/jcs.02565
- Harburger, D. S., & Calderwood, D. A. (2009). Integrin signalling at a glance. *J Cell Sci*, 122(Pt 2), 159-163. doi: 10.1242/jcs.018093
- Heath, J. P. (1996). Epithelial cell migration in the intestine. *Cell Biol Int*, 20(2), 139-146. doi: 10.1006/cbir.1996.0018
- Kanchanawong, P., Shtengel, G., Pasapera, A. M., Ramko, E. B., Davidson, M. W., Hess, H. F., & Waterman, C. M. (2010). Nanoscale architecture of integrin-based cell adhesions. *Nature*, 468(7323), 580-584. doi: 10.1038/nature09621
- Kim, D. H., & Wirtz, D. (2013). Focal adhesion size uniquely predicts cell migration. *FASEB J*, 27(4), 1351-1361. doi: 10.1096/fj.12-220160
- Kim, M., Ogawa, M., Fujita, Y., Yoshikawa, Y., Nagai, T., Koyama, T., . . . Sasakawa, C. (2009). Bacteria hijack integrin-linked kinase to stabilize focal adhesions and block cell detachment. *Nature*, 459(7246), 578-582. doi: 10.1038/nature07952
- Konkel, M. E., Corwin, M. D., Joens, L. A., & Cieplak, W. (1992). Factors that influence the interaction of *Campylobacter jejuni* with cultured mammalian cells. *J Med Microbiol*, 37(1), 30-37. doi: 10.1099/00222615-37-1-30
- Konkel, M. E., Klena, J. D., Rivera-Amill, V., Monteville, M. R., Biswas, D., Raphael, B., & Mickelson, J. (2004). Secretion of virulence proteins from *Campylobacter jejuni* is dependent on a functional flagellar export apparatus. *J Bacteriol*, 186(11), 3296-3303.
- Konkel, M. E., Monteville, M. R., Rivera-Amill, V., & Joens, L. A. (2001). The pathogenesis of *Campylobacter jejuni*-mediated enteritis. *Curr Issues Intest Microbiol*, 2(2), 55-71.
- Konkel, M. E., Samuelson, D. R., Eucker, T. P., Shelden, E. A., & O'Loughlin, J. L. (2013). Invasion of epithelial cells by *Campylobacter jejuni* is independent of caveolae. *Cell Commun Signal*, 11, 100. doi: 10.1186/1478-811x-11-100
- Konkel, M. E., Talukdar, P. K., Negretti, N. M., & Klappenbach, C. M. (2020). Taking control: *Campylobacter jejuni* binding to fibronectin sets the stage for cellular adherence and invasion. *Front Microbiol*, 11, 564. doi: 10.3389/fmicb.2020.00564
- Krause-Gruszczynska, M., Boehm, M., Rohde, M., Tegtmeyer, N., Takahashi, S., Buday, L., . . . Backert, S. (2011). The signaling pathway of *Campylobacter jejuni*-induced Cdc42 activation: Role of fibronectin, integrin beta1, tyrosine kinases and guanine exchange factor Vav2. *Cell Commun Signal*, 9, 32. doi: 10.1186/1478-811x-9-32
- Krause-Gruszczynska, M., Rohde, M., Hartig, R., Genth, H., Schmidt, G., Keo, T., . . . Backert, S. (2007). Role of the small Rho GTPases Rac1 and Cdc42 in host cell invasion of *Campylobacter jejuni*. *Cell Microbiol*, 9(10), 2431-2444. doi: 10.1111/j.1462-5822.2007.00971.x
- Lacy, E. R. (1988). Epithelial restitution in the gastrointestinal tract. *J Clin Gastroenterol*, 10 Suppl 1, S72-77.



- Le Devedec, S. E., Geverts, B., de Bont, H., Yan, K., Verbeek, F. J., Houtsmuller, A. B., & van de Water, B. (2012). The residence time of focal adhesion kinase (FAK) and paxillin at focal adhesions in renal epithelial cells is determined by adhesion size, strength and life cycle status. *J Cell Sci*, 125(Pt 19), 4498-4506. doi: 10.1242/jcs.104273
- Lee, C. A., & Falkow, S. (1990). The ability of *Salmonella* to enter mammalian cells is affected by bacterial growth state. *Proc Natl Acad Sci U S A*, 87(11), 4304-4308. doi: 10.1073/pnas.87.11.4304
- Lee, J. L., & Streuli, C. H. (2014). Integrins and epithelial cell polarity. *J Cell Sci*, 127(Pt 15), 3217-3225. doi: 10.1242/jcs.146142
- Lietha, D., & Eck, M. J. (2008). Crystal structures of the FAK kinase in complex with TAE226 and related bis-anilino pyrimidine inhibitors reveal a helical DFG conformation. *PLoS One*, 3(11), e3800. doi: 10.1371/journal.pone.0003800
- Lotz, M. M., Rabinovitz, I., & Mercurio, A. M. (2000). Intestinal restitution: progression of actin cytoskeleton rearrangements and integrin function in a model of epithelial wound healing. *Am J Pathol*, 156(3), 985-996. doi: 10.1016/S0002-9440(10)64966-8
- Lu, R., & Goldberg, M. B. (2010). Bacterial exploitation of host cell signaling. *Sci Transl Med*, 2(51), 51ps48. doi: 10.1126/scitranslmed.3001612
- Ly, K. T., & Casanova, J. E. (2007). Mechanisms of *Salmonella* entry into host cells. *Cell Microbiol*, 9(9), 2103-2111. doi: 10.1111/j.1462-5822.2007.00992.x
- MacCallum, A., Haddock, G., & Everest, P. H. (2005). *Campylobacter jejuni* activates mitogen-activated protein kinases in Caco-2 cell monolayers and in vitro infected primary human colonic tissue. *Microbiology*, 151(Pt 8), 2765-2772. doi: 10.1099/mic.0.27979-0
- May, M., Kolbe, T., Wang, T., Schmidt, G., & Genth, H. (2012). Increased cell-matrix adhesion upon constitutive activation of Rho proteins by cytotoxic necrotizing factors from *E. coli* and *Y. pseudotuberculosis*. *J Signal Transduct*, 2012, 570183. doi: 10.1155/2012/570183
- McLaughlin, L. M., Govoni, G. R., Gerke, C., Gopinath, S., Peng, K., Laidlaw, G., . . . Monack, D. (2009). The *Salmonella* SPI2 effector SseI mediates long-term systemic infection by modulating host cell migration. *PLoS Pathog*, 5(11), e1000671. doi: 10.1371/journal.ppat.1000671
- Mitra, S. K., Hanson, D. A., & Schlaepfer, D. D. (2005). Focal adhesion kinase: in command and control of cell motility. *Nat Rev Mol Cell Biol*, 6(1), 56-68. doi: 10.1038/nrm1549
- Monteville, M. R., & Konkel, M. E. (2002). Fibronectin-facilitated invasion of T84 eukaryotic cells by *Campylobacter jejuni* occurs preferentially at the basolateral cell surface. *Infect Immun*, 70(12), 6665-6671. doi: 10.1128/iai.70.12.6665-6671.2002
- Monteville, M. R., Yoon, J. E., & Konkel, M. E. (2003). Maximal adherence and invasion of INT 407 cells by *Campylobacter jejuni* requires the CadF outer-membrane protein and microfilament reorganization. *Microbiology*, 149(Pt 1), 153-165.
- Moore, R., Carlson, S., & Madara, J. L. (1989). Villus contraction aids repair of intestinal epithelium after injury. *Am J Physiol*, 257(2 Pt 1), G274-283. doi: 10.1152/ajpgi.1989.257.2.G274
- Nagano, M., Hoshino, D., Koshikawa, N., Akizawa, T., & Seiki, M. (2012). Turnover of focal adhesions and cancer cell migration. *Int J Cell Biol*, 2012, 310616. doi: 10.1155/2012/310616
- Neal-McKinney, J. M., & Konkel, M. E. (2012). The *Campylobacter jejuni* CiaC virulence protein is secreted from the flagellum and delivered to the cytosol of host cells. *Front. Cell. Inf. Microbio.*, 2(31), 1-15.
- Negretti, N. M., Clair, G., Talukdar, P. K., Gourley, C. R., Huynh, S., Adkins, J. N., . . . Konkel, M. E. (2019). *Campylobacter jejuni* demonstrates conserved proteomic and transcriptomic responses when co-cultured with human INT 407 and Caco-2 epithelial cells. *Front Microbiol*, 10, 755. doi: 10.3389/fmicb.2019.00755
- Negretti, N. M., Gourley, C. R., Talukdar, P. K., Clair, G., Klappenbach, C. M., Lauritsen, C. J., . . . Konkel, M. E. (2021). The *Campylobacter jejuni* CiaD effector co-opts the host cell protein IQGAP1 to promote cell entry. *Nat Commun*, 12(1), 1339. doi: 10.1038/s41467-021-21579-5

- Ó Cróinín, Tadhg, & Backert, S. (2012). Host epithelial cell invasion by *Campylobacter jejuni*: trigger or zipper mechanism? *Front Cell Infect Microbiol*, 2, 25. doi: 10.3389/fcimb.2012.00025
- Owen, K. A., Meyer, C. B., Bouton, A. H., & Casanova, J. E. (2014). Activation of focal adhesion kinase by *Salmonella* suppresses autophagy via an Akt/mTOR signaling pathway and promotes bacterial survival in macrophages. *PLoS Pathog*, 10(6), e1004159. doi: 10.1371/journal.ppat.1004159
- Pentecost, M., Otto, G., Theriot, J. A., & Amieva, M. R. (2006). *Listeria monocytogenes* invades the epithelial junctions at sites of cell extrusion. *PLoS Pathog*, 2(1), e3. doi: 10.1371/journal.ppat.0020003
- Pokharel, S. M., Shil, N. K., Gc, J. B., Colburn, Z. T., Tsai, S. Y., Segovia, J. A., . . . Bose, S. (2019). Integrin activation by the lipid molecule 25-hydroxycholesterol induces a proinflammatory response. *Nat Commun*, 10(1), 1482. doi: 10.1038/s41467-019-09453-x
- Ribet, D., & Cossart, P. (2015). How bacterial pathogens colonize their hosts and invade deeper tissues. *Microbes Infect*, 17(3), 173-183. doi: 10.1016/j.micinf.2015.01.004
- Ruiz-Palacios, G. M. (2007). The health burden of *Campylobacter* infection and the impact of antimicrobial resistance: playing chicken. *Clin Infect Dis*, 44(5), 701-703. doi: 10.1086/509936
- Samuelson, D. R., & Konkel, M. E. (2013). Serine phosphorylation of cortactin is required for maximal host cell invasion by *Campylobacter jejuni*. *Cell Commun Signal*, 11, 82. doi: 10.1186/1478-811X-11-82
- Schaller, M. D. (2001). Paxillin: a focal adhesion-associated adaptor protein. *Oncogene*, 20(44), 6459-6472. doi: 10.1038/sj.onc.1204786
- Schnee, A. E., & Petri, W. A., Jr. (2017). *Campylobacter jejuni* and associated immune mechanisms: short-term effects and long-term implications for infants in low-income countries. *Curr Opin Infect Dis*, 30(3), 322-328. doi: 10.1097/QCO.0000000000000364
- Sen, S., & Kumar, S. (2009). Cell-Matrix de-adhesion dynamics reflect contractile mechanics. *Cell Mol Bioeng*, 2(2), 218-230. doi: 10.1007/s12195-009-0057-7
- Shi, J., & Casanova, J. E. (2006). Invasion of host cells by *Salmonella typhimurium* requires focal adhesion kinase and p130Cas. *Mol Biol Cell*, 17(11), 4698-4708. doi: 10.1091/mbc.e06-06-0492
- Shtengel, G., Galbraith, J. A., Galbraith, C. G., Lippincott-Schwartz, J., Gillette, J. M., Manley, S., . . . Hess, H. F. (2009). Interferometric fluorescent super-resolution microscopy resolves 3D cellular ultrastructure. *Proc Natl Acad Sci U S A*, 106(9), 3125-3130. doi: 10.1073/pnas.0813131106
- Stieler Stewart, A., Freund, J. M., Blikslager, A. T., & Gonzalez, L. M. (2018). Intestinal stem cell isolation and culture in a porcine model of segmental small intestinal ischemia. *J Vis Exp*(135). doi: 10.3791/57647
- Stutchbury, B., Atherton, P., Tsang, R., Wang, D. Y., & Ballestrem, C. (2017). Distinct focal adhesion protein modules control different aspects of mechanotransduction. *J Cell Sci*, 130(9), 1612-1624. doi: 10.1242/jcs.195362
- Sumagin, R., Robin, A. Z., Nusrat, A., & Parkos, C. A. (2013). Activation of PKC $\beta$ II by PMA facilitates enhanced epithelial wound repair through increased cell spreading and migration. *PLoS One*, 8(2), e55775. doi: 10.1371/journal.pone.0055775
- Swanson, P. A., 2nd, Kumar, A., Samarin, S., Vijay-Kumar, M., Kundu, K., Murthy, N., . . . Neish, A. S. (2011). Enteric commensal bacteria potentiate epithelial restitution via reactive oxygen species-mediated inactivation of focal adhesion kinase phosphatases. *Proc Natl Acad Sci U S A*, 108(21), 8803-8808. doi: 10.1073/pnas.1010042108
- Talukdar, P. K., Negretti, N. M., Turner, K. L., & Konkel, M. E. (2020). Molecular dissection of the *Campylobacter jejuni* CadF and FlpA virulence proteins in binding to host cell fibronectin. *Microorganisms*, 8(3). doi: 10.3390/microorganisms8030389

- Valles, A. M., Beuvin, M., & Boyer, B. (2004). Activation of Rac1 by paxillin-Crk-DOCK180 signaling complex is antagonized by Rap1 in migrating NBT-II cells. *J Biol Chem*, 279(43), 44490-44496. doi: 10.1074/jbc.M405144200
- van Spreeuwel, J. P., Duursma, G. C., Meijer, C. J., Bax, R., Rosekrans, P. C., & Lindeman, J. (1985). *Campylobacter* colitis: histological immunohistochemical and ultrastructural findings. *Gut*, 26(9), 945-951. doi: 10.1136/gut.26.9.945
- Verhoeff-Bakkenes, L., Hazeleger, W. C., Zwietering, M. H., & De Jonge, R. (2008). Lack of response of INT-407 cells to the presence of non-culturable *Campylobacter jejuni*. *Epidemiol Infect*, 136(10), 1401-1406. doi: 10.1017/s0950268807000040
- Wassenaar, T. M., & Blaser, M. J. (1999). Pathophysiology of *Campylobacter jejuni* infections of humans. *Microbes Infect*, 1(12), 1023-1033.
- Wassenaar, T. M., Bleumink-Pluym, N. M., & van der Zeijst, B. A. (1991). Inactivation of *Campylobacter jejuni* flagellin genes by homologous recombination demonstrates that *flaA* but not *flaB* is required for invasion. *EMBO J*, 10(8), 2055-2061.
- Webb, D. J., Donais, K., Whitmore, L. A., Thomas, S. M., Turner, C. E., Parsons, J. T., & Horwitz, A. F. (2004). FAK-Src signalling through paxillin, ERK and MLCK regulates adhesion disassembly. *Nat Cell Biol*, 6(2), 154-161. doi: 10.1038/ncb1094
- Wehrle-Haller, B., & Imhof, B. (2002). The inner lives of focal adhesions. *Trends Cell Biol*, 12(8), 382-389.
- Williams, J. M., Duckworth, C. A., Burkitt, M. D., Watson, A. J., Campbell, B. J., & Pritchard, D. M. (2015). Epithelial cell shedding and barrier function: a matter of life and death at the small intestinal villus tip. *Vet Pathol*, 52(3), 445-455. doi: 10.1177/0300985814559404
- Wrighton, K. H. (2013). Cell adhesion: the 'ins' and 'outs' of integrin signalling. *Nat Rev Mol Cell Biol*, 14(12), 752. doi: 10.1038/nrm3708
- Wu, C. (2007). Focal adhesion: a focal point in current cell biology and molecular medicine. *Cell Adh Migr*, 1(1), 13-18. doi: 10.4161/cam.1.1.4081
- Yao, R., Burr, D. H., Doig, P., Trust, T. J., Niu, H., & Guerry, P. (1994). Isolation of motile and non-motile insertional mutants of *Campylobacter jejuni*: the role of motility in adherence and invasion of eukaryotic cells. *Mol Microbiol*, 14(5), 883-893.
- Zaidel-Bar, R., Milo, R., Kam, Z., & Geiger, B. (2007). A paxillin tyrosine phosphorylation switch regulates the assembly and form of cell-matrix adhesions. *J Cell Sci*, 120(Pt 1), 137-148. doi: 10.1242/jcs.03314
- Ziegler, A., Gonzalez, L., & Blikslager, A. (2016). Large animal models: The key to translational discovery in digestive disease research. *Cell Mol Gastroenterol Hepatol*, 2(6), 716-724. doi: 10.1016/j.jcmgh.2016.09.003



## SUPPLEMENTARY FIGURES

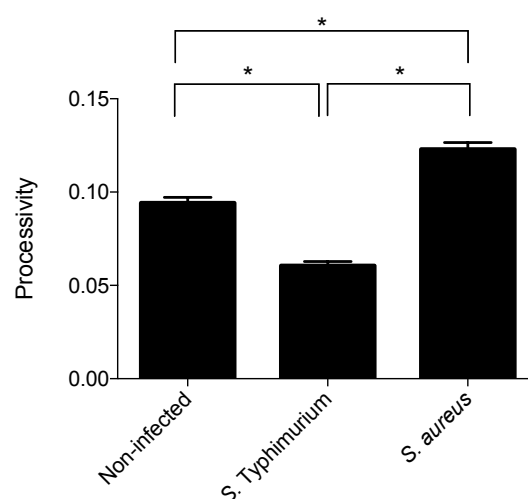

### Supplementary Figure 1:

*Salmonella enterica* serovar Typhimurium (*S. Typhimurium*), but not *Staphylococcus aureus*, decrease single cell motility. A549 cells were infected with *S. typhimurium* or *S. aureus* for 60 minutes, rinsed with PBS, and imaged for five hours with one image taken every five minutes. Cells were tracked over time, and processivity (path distance divided by path displacement) was calculated to quantify motility. Error bars represent SEM, \* indicates  $p < 0.0001$  (Students T Test). More than 500 cells imaged per condition.

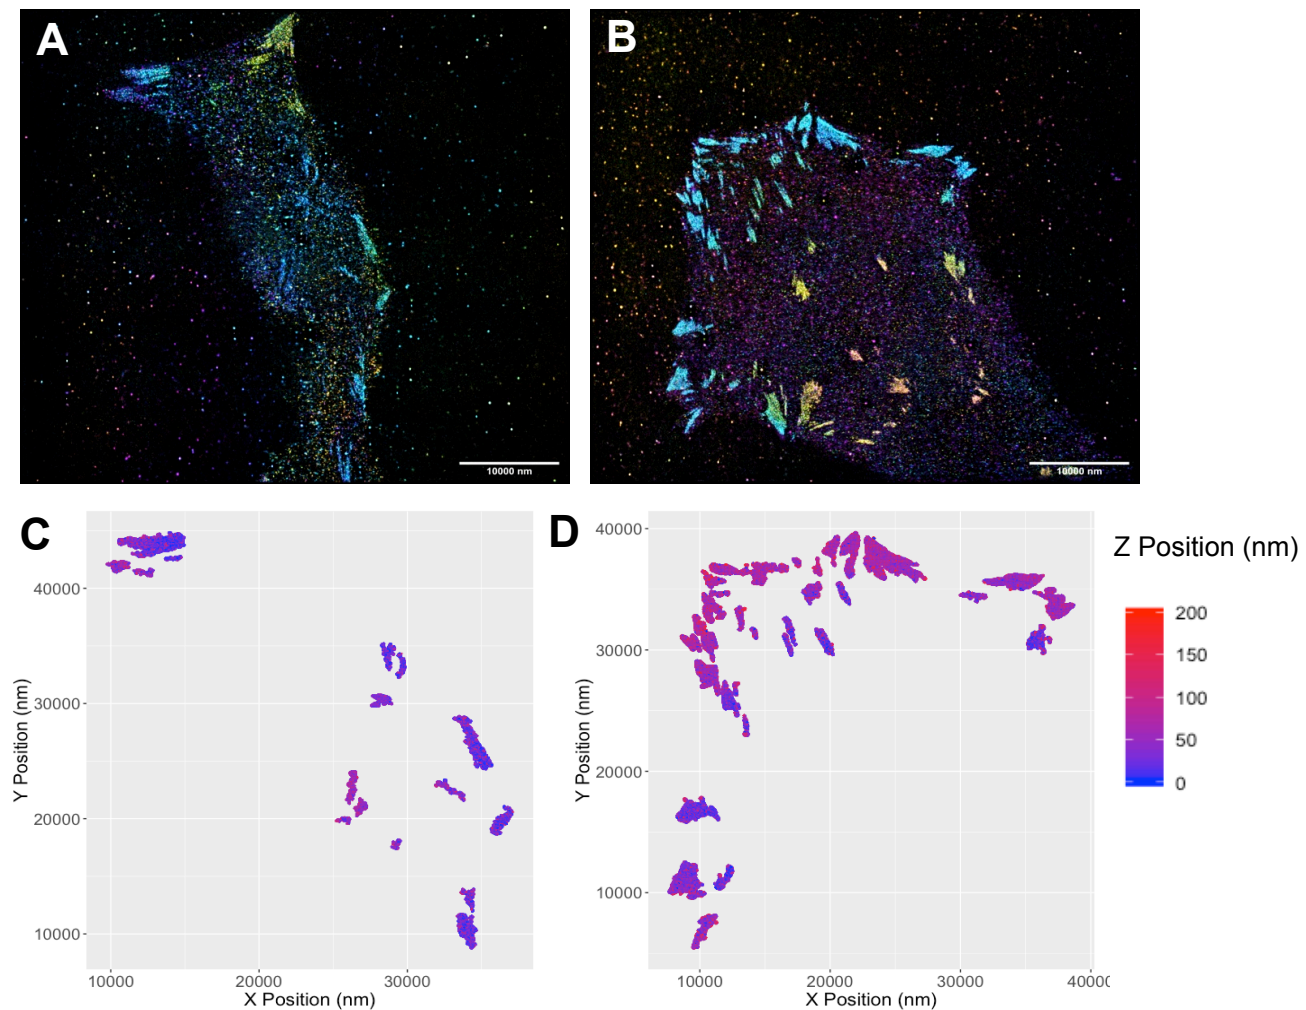

### Supplementary Figure 2:

Representative images of super-resolution iPALM imaging showing that *C. jejuni* changes the nanoscale topology of the focal adhesion. **A.** Representative iPALM image of a non-infected cell. **B.** Representative iPALM image of a *C. jejuni* infected cell. **C.** Focal adhesions from the non-infected cell show in panel A. The Z position of fluorophores was corrected to the Z position of gold fiducials embedded into the coverslip as described in the materials and methods. Z position is indicated by color scale gradient. **D.** Focal adhesions from the *C. jejuni* infected cell shown in panel B. The focal adhesions of *C. jejuni* infected cells are displaced upwards compared to non-infected cells. Focal adhesions present in panels A and B but not panels C and D represent focal adhesions removed from analysis for having an average Z position less than 0 nm.

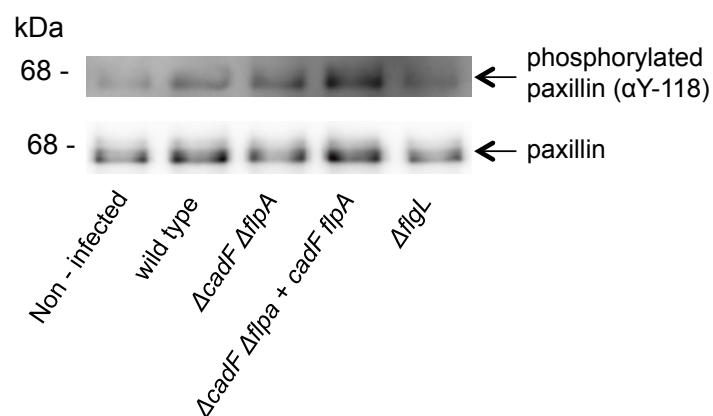

**Supplementary Figure 3:** Representative blot demonstrating *C. jejuni* driven paxillin phosphorylation and dependence on the CadF and FlpA adhesins and the flagellum. Whole-cell lysates from *C. jejuni* infected INT 407 cells were analyzed by SDS-PAGE and Immunoblot. Blots were probed for total paxillin and phosphorylated paxillin (Y118).
